# Supplementary material for: Factors affecting how well athletes perform mentally: The impact of optimism, pessimism, and mental well-being
Source: Research Square preprint supplement (doi:10.21203/rs.3.rs-6865136/v1), 2025-07-18
Supplement: Supplementary file 1 [file 6227384299ddb33ff8237c8b.xlsx]

## Sheet: Sayfa1
Gender	Age	Sports Type	Licenced Sports Experience	National Athlete Experience	Optimism Q 1	Optimism Q 2	Optimism Q 3	Optimism Q 4	Optimism Q 5	Optimism Q 6	Optimism Q 7	Optimism Q 8	Optimism Q 9	Pessimism Q 1	Pessimism Q 2	Pessimism Q 3	Pessimism Q 4	Pessimism Q 5	Pessimism Q 6	Pessimism Q 7	Pessimism Q 8	Pessimism Q 9	Mental Well-being Q 1	Mental Well-being Q 2	Mental Well-being Q 3	Mental Well-being Q 4	Mental Well-being Q 5	Mental Well-being Q 6	Mental Well-being Q 7	Psychological Performance Evaluation Q 1	Psychological Performance Evaluation Q 2	Psychological Performance Evaluation Q 3	Psychological Performance Evaluation Q 4	Psychological Performance Evaluation Q 5	Psychological Performance Evaluation Q 6	Psychological Performance Evaluation Q 7	Psychological Performance Evaluation Q 8	Psychological Performance Evaluation Q 9	Psychological Performance Evaluation Q 10	Psychological Performance Evaluation Q 11	Psychological Performance Evaluation Q 12	Psychological Performance Evaluation Q 13	Psychological Performance Evaluation Q 14	Psychological Performance Evaluation Q 15	Psychological Performance Evaluation Q 16	Psychological Performance Evaluation Q 17	Psychological Performance Evaluation Q 18	Psychological Performance Evaluation Q 19	Psychological Performance Evaluation Q 20
2	23	1	10	2	4	4	5	5	5	4	3	4	5	1	1	1	1	1	1	2	1	2	4	5	4	4	5	4	5	2	2	2	1	2	1	2	2	1	2	2	2	2	1	1	1	1	4	5	5
2	23	1	2	2	3	4	4	3	4	3	3	4	4	2	1	1	1	2	1	1	2	1	4	4	4	5	5	4	5	3	4	3	2	2	3	3	2	2	3	2	3	2	2	3	3	2	4	5	4
2	23	1	10	2	4	4	2	3	4	3	2	3	4	3	1	2	1	1	1	2	2	3	4	4	4	2	3	4	5	4	4	3	2	4	1	3	2	1	3	3	4	2	3	2	1	2	4	4	5
2	27	1	6	2	4	4	3	4	5	2	2	3	4	1	1	1	2	1	2	1	2	1	3	3	4	3	2	2	5	4	3	3	2	3	3	2	2	2	3	3	2	3	2	2	3	3	3	4	3
1	23	2	13	1	5	5	5	5	5	5	5	5	5	1	1	1	1	1	1	1	1	1	5	5	5	5	5	5	5	1	1	1	1	1	1	1	1	1	1	1	2	3	3	2	3	1	1	5	5
1	22	2	1	2	4	4	3	4	4	3	4	4	5	2	1	1	1	1	1	1	2	1	4	3	4	3	3	4	3	3	3	3	4	1	1	2	2	3	2	2	2	2	2	1	2	2	3	3	3
1	19	2	5	2	3	4	4	5	5	5	3	5	5	1	1	1	1	1	1	1	1	1	3	4	3	2	4	4	4	2	5	3	1	2	1	1	1	1	1	3	3	2	1	3	2	3	2	4	4
1	18	2	6	2	5	5	5	5	5	4	5	5	5	1	1	1	1	1	1	1	1	1	4	4	4	4	4	4	5	3	1	2	2	1	2	1	1	2	2	1	1	1	1	1	1	1	5	5	5
1	18	2	5	2	5	5	5	5	4	5	5	5	4	3	2	4	3	2	2	5	2	5	5	4	5	5	5	5	5	5	2	2	5	5	5	5	5	5	5	5	5	5	5	5	5	5	5	5	5
1	26	2	5	2	5	5	3	4	5	4	5	4	5	2	1	1	2	4	1	1	2	3	4	5	3	4	3	4	5	4	2	1	1	2	1	4	3	1	3	1	2	1	1	2	2	1	4	5	5
1	25	2	5	2	4	5	4	5	4	4	3	3	4	3	3	2	2	2	2	2	2	2	3	4	5	4	4	3	4	3	3	2	2	3	2	3	2	1	2	4	3	2	2	3	3	2	5	5	5
1	18	2	6	2	4	5	4	4	3	4	5	5	4	2	1	1	1	2	1	2	1	1	5	5	5	4	4	4	5	3	2	3	1	1	1	1	1	4	2	1	1	2	1	1	1	1	5	5	5
1	25	2	10	2	5	5	5	4	5	5	5	5	5	1	1	2	1	1	1	1	1	1	5	5	5	5	5	5	5	3	3	3	1	1	3	1	1	1	1	1	1	1	3	1	3	2	5	5	5
1	18	2	4	2	5	4	3	4	4	3	3	4	5	1	2	1	1	2	1	1	2	1	5	4	4	4	5	4	4	2	1	1	1	1	1	1	1	2	1	1	1	1	3	1	2	2	5	5	4
1	26	2	11	2	3	3	4	2	2	2	2	2	3	4	5	4	4	4	4	4	4	4	3	3	3	2	3	4	4	2	3	4	4	2	4	4	4	3	4	4	4	3	4	4	4	3	3	4	5
1	25	2	4	2	5	4	5	5	5	5	3	5	5	2	1	1	1	2	1	1	1	2	4	5	4	4	4	2	5	4	5	2	4	1	1	2	1	1	2	2	2	1	4	2	3	1	5	5	4
1	26	2	8	2	5	5	4	4	5	5	4	5	3	1	1	1	1	1	1	1	1	3	3	5	4	5	4	4	5	3	3	2	4	1	1	1	3	1	3	2	1	1	1	3	3	1	5	5	5
1	26	2	15	2	5	5	5	5	5	5	5	5	5	1	1	1	1	1	1	1	1	1	5	5	5	5	5	5	5	2	2	1	2	1	1	1	1	1	1	1	1	1	1	1	1	1	3	5	5
1	35	2	20	2	5	5	4	4	4	3	5	3	4	2	1	2	1	2	1	2	2	2	4	4	5	4	4	2	5	2	1	2	3	1	3	1	1	1	1	1	1	1	1	1	2	1	5	4	4
1	25	2	12	2	3	3	4	3	3	3	1	3	3	1	1	1	1	3	3	3	1	1	5	5	1	4	3	3	5	5	1	3	5	1	3	1	3	3	3	4	3	3	4	3	3	3	3	3	3
1	30	2	24	2	4	5	5	4	4	4	5	5	5	1	1	1	1	1	1	1	1	1	5	5	5	5	4	5	5	3	3	2	5	1	1	1	1	2	1	1	1	1	1	1	1	1	5	5	5
1	18	2	4	2	3	3	4	4	4	3	3	4	3	4	2	2	3	3	2	2	2	2	3	3	3	4	3	4	4	4	4	4	2	4	2	3	2	2	2	4	3	3	5	4	5	4	5	5	5
1	22	2	10	1	5	5	3	5	5	5	5	5	5	1	1	1	1	1	1	1	1	1	5	5	5	5	5	5	5	1	1	1	1	1	1	1	1	1	1	1	1	1	1	1	1	1	5	5	5
1	21	2	12	2	5	4	3	5	5	3	3	5	5	1	1	1	1	2	1	1	1	1	5	5	5	4	5	5	5	3	1	1	2	1	1	1	1	1	1	1	1	1	1	1	1	1	1	1	1
1	18	2	6	2	5	4	3	5	5	5	4	5	4	1	1	1	1	2	1	1	1	1	5	5	4	5	5	3	5	4	4	2	3	1	1	2	1	5	1	1	1	1	1	3	3	1	5	5	5
1	27	2	15	2	3	5	5	3	5	3	2	5	5	1	1	1	1	1	1	1	1	1	3	5	5	5	5	5	5	1	3	3	3	1	1	1	1	3	1	1	1	1	1	1	1	3	5	5	5
1	23	2	11	2	4	3	2	4	4	3	2	4	4	1	2	1	1	2	1	1	1	1	3	4	4	4	4	3	4	2	2	2	2	1	1	1	1	2	1	1	1	1	1	2	1	2	5	5	5
1	19	2	8	2	4	4	3	4	5	3	3	4	5	4	1	2	2	1	1	3	2	2	4	4	3	3	4	4	4	2	2	2	2	1	1	2	2	2	3	3	3	2	3	3	2	2	5	4	4
1	27	2	13	2	5	5	4	4	5	5	4	5	5	1	1	1	1	2	1	2	2	1	3	4	5	4	3	4	5	2	2	3	1	3	1	2	2	2	2	1	3	3	1	2	2	3	3	5	4
1	35	2	22	2	5	5	5	4	5	3	5	3	5	2	1	1	1	2	1	1	2	1	5	5	5	5	4	4	5	2	2	1	3	1	2	1	2	2	1	2	2	1	3	1	1	1	5	5	5
1	19	2	10	2	4	4	2	4	4	3	5	3	4	3	4	5	1	3	1	1	4	3	2	2	1	3	3	5	4	4	2	1	1	4	1	5	4	2	5	5	4	1	5	5	5	5	4	5	5
1	35	2	25	2	4	5	5	5	5	5	3	5	5	1	1	1	1	2	1	1	1	2	5	5	5	5	5	5	5	4	2	3	2	3	1	2	1	3	2	1	2	1	2	2	1	2	5	5	5
1	35	2	10	2	5	5	5	5	5	5	4	5	5	2	2	1	1	1	1	1	2	2	5	5	5	4	4	4	5	4	1	3	2	3	1	3	2	2	3	2	3	2	3	3	2	2	4	4	4
1	25	1	13	2	5	3	2	5	5	5	5	5	5	1	1	1	1	1	1	1	1	1	3	5	5	3	5	5	5	5	3	2	2	1	1	2	1	2	1	1	1	2	1	1	1	1	5	5	5
1	35	2	20	2	3	4	4	4	5	4	5	1	5	1	1	1	1	1	1	1	1	1	5	4	4	4	5	3	4	3	2	1	2	1	1	2	1	1	1	1	1	2	2	1	1	1	4	5	5
1	35	2	20	2	4	4	5	5	5	5	5	5	5	1	1	1	1	1	1	1	1	1	5	5	3	3	3	3	5	2	2	1	3	1	2	3	2	3	2	1	2	3	5	2	3	3	5	5	5
1	29	2	17	2	4	4	4	4	5	3	4	3	5	1	1	1	1	2	1	1	1	1	4	5	5	4	3	5	5	4	2	1	1	1	1	2	1	1	1	1	1	2	1	1	1	2	4	4	5
1	30	2	10	2	1	1	1	3	3	3	2	2	4	3	5	3	5	2	1	4	1	3	1	1	1	3	3	3	4	1	1	3	3	3	3	3	3	3	1	2	3	3	3	3	3	4	2	2	1
1	18	2	5	2	1	4	2	5	3	3	3	5	5	1	1	1	1	2	1	1	2	1	5	5	5	4	3	4	4	1	1	3	3	3	3	2	3	2	1	3	4	1	1	2	3	5	3	2	2
2	35	2	18	2	3	3	3	4	3	3	3	4	4	3	2	2	1	1	2	1	2	2	3	4	3	3	3	5	5	4	3	3	3	3	3	3	3	3	3	3	3	3	3	3	3	3	3	3	4
1	26	2	15	2	4	4	4	4	4	4	4	4	4	4	4	4	4	4	4	4	4	4	3	2	2	3	4	4	4	2	2	2	3	4	4	4	4	2	4	4	2	2	4	2	4	4	4	4	4
1	26	2	12	2	2	1	3	5	4	4	4	4	4	4	4	4	4	4	3	1	3	2	2	1	4	4	3	1	4	2	3	1	1	4	4	3	3	5	4	3	2	1	1	1	1	3	4	4	4
1	23	2	5	2	3	4	4	4	4	3	5	4	5	1	2	1	2	2	1	1	3	2	3	3	3	4	5	2	5	3	5	4	2	3	5	5	3	1	2	4	3	4	2	4	4	3	4	4	5
2	23	1	4	2	4	5	4	3	4	3	3	3	4	3	2	2	1	2	2	3	3	3	4	4	4	4	4	3	5	3	3	3	2	2	3	3	2	2	3	3	3	2	2	2	1	1	4	5	5
2	28	1	15	2	5	5	3	5	5	5	5	5	5	1	1	2	3	3	1	1	1	1	3	5	3	5	5	5	5	3	1	1	1	1	1	2	1	1	1	2	1	1	1	1	2	1	5	5	5
1	24	2	9	2	5	5	4	5	5	4	3	3	5	3	1	2	1	2	1	2	2	3	3	3	4	4	4	5	5	3	3	3	2	4	2	3	2	3	2	3	3	3	2	3	4	4	5	5	5
2	24	2	2	2	4	4	4	3	4	3	3	3	3	4	3	3	3	3	3	2	3	4	2	1	2	2	2	4	5	5	3	3	2	5	2	1	3	1	2	4	3	3	2	2	3	2	4	5	5
1	25	2	5	2	5	5	5	5	5	5	5	5	5	1	1	1	1	1	1	1	1	1	5	5	4	5	5	5	4	3	3	1	1	2	1	1	1	2	1	1	2	2	1	2	1	3	5	5	5
1	27	2	6	2	5	5	5	4	5	4	5	5	5	1	1	1	1	1	1	1	1	1	4	5	4	5	5	5	5	3	1	1	1	2	1	1	1	2	1	2	1	1	1	1	1	2	1	5	5
1	25	2	12	2	4	4	3	4	5	3	4	4	4	1	1	1	1	2	1	1	2	2	3	3	4	4	5	4	5	3	2	1	3	1	1	1	1	1	3	2	3	2	1	2	2	1	5	5	5
2	25	2	3	2	2	3	2	2	4	3	5	3	3	2	1	2	2	5	1	3	3	3	2	2	2	1	1	4	4	5	5	5	2	5	1	4	3	2	2	4	4	3	4	1	5	3	4	5	5
1	26	2	15	2	5	5	2	5	4	3	2	4	5	1	1	1	1	2	1	1	1	1	4	4	4	3	3	2	5	4	3	2	3	1	2	2	1	3	4	2	2	2	2	2	2	2	4	5	5
2	18	2	7	2	5	5	2	5	3	5	3	3	2	1	1	1	1	2	1	1	1	1	5	5	5	5	5	5	3	3	2	1	1	1	5	1	1	2	1	1	1	1	1	1	1	1	4	5	5
1	35	2	20	2	3	3	3	2	3	3	1	2	5	2	2	3	3	2	3	3	1	1	3	5	5	4	5	3	5	2	3	3	3	1	1	1	1	2	3	3	1	2	1	1	1	2	3	2	2
1	34	2	20	2	3	4	4	4	3	3	3	4	4	2	1	1	2	2	1	1	1	1	4	4	4	4	4	4	4	4	2	1	2	2	2	2	1	3	3	2	2	2	3	3	3	3	4	4	4
1	25	2	10	2	5	5	4	4	3	4	5	5	4	1	1	1	1	2	3	1	1	2	4	1	3	5	5	5	5	5	3	3	3	1	3	3	1	3	3	2	2	4	1	1	3	1	2	5	5
2	25	1	10	1	5	5	3	5	5	5	4	5	5	1	1	1	1	1	2	1	1	1	5	5	5	5	5	5	5	2	2	2	1	1	1	1	2	4	4	4	4	1	2	2	4	2	3	5	5
1	24	2	12	2	4	4	4	5	5	4	4	4	3	1	1	1	1	2	2	1	1	1	4	5	4	3	3	3	4	2	3	3	3	3	3	3	2	2	3	2	3	3	2	2	2	2	3	3	3
1	26	2	10	2	5	5	4	4	5	4	4	4	5	1	1	1	1	1	1	1	1	1	4	5	4	4	4	4	4	2	2	1	2	1	2	1	1	1	2	1	1	1	1	1	1	1	1	4	4
2	22	1	2	2	4	4	4	4	4	4	4	4	4	1	3	3	2	4	5	3	3	3	3	3	3	3	3	4	4	3	5	3	3	4	4	5	4	3	3	3	4	5	1	3	3	3	3	4	5
1	23	1	8	1	4	4	1	5	5	5	5	5	4	1	1	1	1	2	1	1	1	1	3	4	3	3	3	5	5	2	2	2	2	2	4	1	1	1	1	1	1	1	4	1	2	1	3	1	1
2	22	1	6	2	5	4	3	3	4	4	2	5	4	1	1	2	3	1	1	1	1	1	5	5	5	4	3	2	5	5	5	3	1	5	1	2	1	1	1	3	2	2	1	2	1	5	3	5	5
2	21	2	10	2	5	5	4	3	5	5	4	5	4	2	1	3	1	2	1	1	2	2	5	5	5	4	4	3	5	4	4	4	2	3	3	2	3	4	3	3	3	4	3	4	3	3	5	5	5
1	23	1	11	2	2	5	4	4	5	5	3	4	5	3	1	1	1	2	1	5	1	1	4	5	4	3	4	5	5	3	5	5	5	5	5	5	4	5	4	5	5	5	5	5	5	5	5	5	5
1	21	2	3	2	2	3	4	2	3	2	3	4	3	1	1	1	1	1	2	2	1	2	3	4	4	3	4	5	4	4	3	3	2	1	3	2	1	2	2	3	3	3	4	4	4	3	5	5	5
1	21	2	11	2	4	4	3	4	4	4	4	3	4	2	1	1	1	1	3	2	2	2	4	4	4	4	4	4	5	3	3	3	3	3	3	3	3	3	3	3	3	3	3	3	3	3	3	3	3
2	22	1	10	2	5	5	3	4	5	5	4	5	5	1	1	1	1	1	1	3	1	1	4	5	3	3	3	4	4	4	3	3	2	3	3	4	3	3	3	3	3	3	3	3	3	3	3	3	3
1	21	1	4	2	3	3	2	4	4	3	2	2	3	1	1	1	2	3	1	2	3	2	4	3	3	3	4	5	4	4	2	3	3	2	1	2	1	2	2	2	3	3	3	2	3	1	5	5	4
1	21	2	2	2	3	5	4	3	4	3	5	4	3	1	1	1	1	1	1	1	1	2	5	5	5	3	4	3	3	2	2	1	3	1	2	1	1	2	1	1	1	1	2	2	1	1	5	5	5
1	21	2	7	2	3	3	2	4	3	2	2	4	4	2	1	2	1	2	1	2	2	2	4	3	3	2	2	2	2	3	2	3	5	2	2	4	3	3	4	3	3	3	4	3	4	2	5	5	5
1	21	1	8	2	5	5	3	5	5	5	5	5	5	2	1	1	1	3	1	1	1	1	3	5	4	4	4	5	5	4	2	2	1	1	1	2	1	1	1	1	2	2	2	1	1	2	5	5	5
1	21	2	2	2	3	3	4	4	4	4	4	3	5	1	1	1	5	3	2	2	1	2	3	3	3	3	4	3	4	3	2	3	2	2	2	1	2	2	2	3	3	3	3	2	3	3	3	3	5
2	21	1	9	2	3	4	3	5	5	4	3	4	5	2	1	1	1	1	1	1	1	1	3	5	3	4	4	3	5	4	3	2	1	5	1	1	1	2	2	3	3	2	2	1	2	3	5	5	5
1	21	1	7	2	5	5	4	5	5	4	3	5	5	1	1	1	1	1	1	1	1	1	2	4	4	4	3	4	5	4	3	4	3	2	2	3	2	3	2	1	1	2	2	3	2	2	4	4	5
1	21	2	6	2	4	5	2	4	5	4	4	3	5	1	1	1	1	1	1	1	1	1	4	5	4	5	4	3	5	3	2	2	2	2	2	2	1	1	2	1	2	2	1	2	2	2	5	5	5
1	23	1	1	2	3	4	4	3	4	4	3	4	4	2	2	2	2	2	2	2	2	2	4	4	3	4	4	3	4	3	2	3	2	1	2	2	2	3	3	2	2	2	4	2	2	3	5	4	5
2	21	1	4	2	4	5	3	3	4	3	3	4	4	2	4	2	3	3	2	3	3	3	4	3	3	3	4	4	4	4	4	4	3	5	3	3	2	3	1	3	3	2	3	3	3	3	5	5	5
2	21	2	3	2	4	4	3	3	4	3	2	4	4	1	1	1	1	1	1	1	1	1	4	5	4	4	4	2	4	4	3	3	2	4	1	2	2	4	3	3	3	1	2	2	2	3	5	5	5
2	22	1	2	2	3	3	3	2	4	3	2	4	3	3	4	3	3	4	2	3	3	3	3	2	3	2	3	2	4	4	4	4	2	3	3	3	3	3	4	4	4	3	4	3	3	4	4	4	4
1	22	1	9	2	4	3	4	2	5	3	3	2	4	1	2	2	3	3	3	3	3	2	3	4	3	3	2	4	4	4	4	3	3	1	2	4	4	3	2	3	3	3	3	3	4	3	5	5	5
1	22	1	13	2	4	4	4	4	4	4	4	4	4	4	4	2	3	2	1	2	1	1	5	4	4	4	4	4	4	3	2	2	2	2	2	2	2	2	2	2	2	2	2	2	2	2	2	2	2
2	22	1	1	2	4	5	3	4	4	4	3	4	5	1	1	1	2	2	1	1	2	1	4	4	4	4	4	4	5	3	2	2	2	2	2	1	2	2	2	2	2	2	1	2	2	2	5	5	5
1	21	2	15	2	4	4	3	4	4	3	2	3	5	1	1	1	1	2	1	2	2	1	4	3	3	3	4	3	4	4	3	3	2	2	2	2	1	3	4	2	3	2	1	3	2	2	4	5	5
1	30	1	1	2	3	4	3	4	4	4	4	4	4	2	2	2	2	2	2	2	2	2	4	4	4	4	4	3	4	2	2	2	3	1	2	2	2	2	2	2	2	2	2	2	2	2	2	2	2
2	21	2	3	2	4	4	5	4	5	5	2	2	4	4	3	4	3	4	2	4	3	2	3	3	3	3	2	4	2	5	4	2	4	3	2	1	5	1	4	5	1	5	5	3	2	4	3	3	4
1	21	1	8	2	5	5	5	4	5	5	5	5	5	5	5	5	5	5	5	5	5	5	4	4	5	3	3	2	5	2	3	3	2	4	5	3	4	3	3	5	4	2	4	5	4	5	4	5	3
1	21	1	11	1	3	4	4	2	4	3	4	4	5	1	1	1	1	1	1	1	1	1	2	5	5	5	5	4	5	2	1	1	2	1	1	2	1	2	2	1	1	1	1	1	1	1	5	5	5
1	22	2	5	2	5	4	4	5	4	4	4	5	5	1	4	5	1	2	1	3	2	1	3	5	3	4	4	4	5	2	2	1	1	1	1	1	1	1	1	1	1	1	1	1	1	1	1	4	4
1	23	1	5	2	3	5	5	5	5	5	5	1	5	1	1	1	1	1	1	1	1	1	5	5	5	5	5	2	5	1	1	1	1	1	1	1	1	1	1	1	1	1	1	1	1	1	5	5	5
1	21	2	5	2	3	3	3	3	3	4	4	3	3	1	1	1	1	1	1	1	1	1	4	4	3	4	4	2	4	3	3	3	3	3	3	1	1	3	1	1	3	2	3	2	1	1	1	4	4
2	21	1	2	2	3	5	5	5	5	5	2	5	5	2	1	2	1	1	1	1	2	1	3	5	3	3	3	5	5	5	3	3	2	2	2	2	3	3	2	1	2	2	3	3	2	2	5	5	5
1	26	1	1	1	2	1	3	5	1	4	5	4	4	3	1	3	1	1	3	2	2	4	1	4	2	5	3	3	1	5	5	5	4	5	5	5	3	4	4	5	3	3	4	5	3	2	4	5	5
2	21	2	2	2	3	5	3	5	4	5	5	5	5	1	1	1	2	1	1	1	1	1	2	5	5	3	5	5	5	3	3	3	3	3	2	2	1	3	2	2	1	2	2	2	1	3	5	5	5
1	22	2	6	2	3	4	5	5	4	4	3	4	4	1	1	1	1	1	1	1	1	1	4	4	5	5	5	3	5	3	2	1	1	2	2	1	1	2	1	2	1	1	1	1	2	1	4	5	5
1	23	1	14	2	2	5	2	5	5	3	5	5	4	1	1	1	1	2	1	1	1	1	2	5	3	4	4	4	5	3	3	3	3	3	4	3	3	3	3	1	3	5	3	3	4	3	5	3	5
1	22	1	4	2	4	5	5	4	4	4	2	4	4	1	1	3	1	2	5	2	1	1	4	4	5	5	5	4	5	4	2	2	2	1	1	1	1	1	1	1	1	1	1	1	1	1	1	4	4
1	21	1	4	2	4	4	2	3	4	4	5	3	5	1	1	1	3	4	2	1	2	3	4	3	3	2	3	2	4	4	3	3	2	3	2	4	3	2	3	2	2	2	3	1	2	3	4	3	3
2	21	1	2	2	3	5	4	5	5	5	3	5	5	5	1	1	1	1	1	1	1	1	5	5	2	5	5	5	5	4	5	1	1	1	1	1	1	1	1	1	1	1	1	1	1	5	5	5	5
2	21	1	5	2	4	5	4	4	5	4	4	4	5	3	2	2	2	2	1	3	2	2	5	5	5	4	5	4	5	3	3	3	1	2	1	3	2	4	3	2	2	3	2	2	2	3	4	5	4
1	21	2	12	2	3	5	3	4	5	4	3	5	4	2	1	1	1	2	1	1	1	2	2	3	4	4	3	3	5	2	3	2	1	2	1	1	1	1	1	1	1	1	1	1	1	2	4	4	4
2	22	1	5	2	4	5	3	4	5	4	3	4	5	1	1	2	2	3	1	2	1	2	4	4	3	4	3	4	5	4	3	2	1	1	1	2	2	2	3	4	3	2	2	4	3	4	5	5	5
1	23	1	8	2	4	4	4	4	4	4	3	4	5	3	1	1	1	2	2	3	2	2	4	4	4	4	5	4	4	3	3	2	3	2	3	2	3	3	3	3	3	2	3	2	3	3	3	3	3
1	24	2	7	2	4	3	3	3	3	3	3	3	4	1	1	1	1	1	1	1	1	1	3	4	4	3	3	3	4	3	3	2	2	1	2	2	2	2	2	2	2	2	1	3	2	2	3	3	4
1	24	1	2	2	5	5	5	5	5	5	5	5	5	1	1	1	1	2	1	1	2	2	3	4	3	4	3	4	5	5	5	3	4	4	4	3	3	4	4	3	3	3	3	3	3	2	2	2	3
2	21	2	4	2	4	3	1	3	3	3	3	3	4	4	2	5	5	5	3	2	3	5	3	2	2	1	2	4	1	5	5	5	2	5	5	5	4	3	5	5	5	3	5	4	4	5	5	5	5
2	21	1	2	2	4	5	4	5	5	5	3	4	5	1	1	1	2	2	1	4	1	1	3	4	4	4	4	3	5	2	1	1	1	1	1	1	1	1	1	1	1	1	1	1	1	2	5	4	5
1	24	2	5	2	4	4	5	4	4	5	4	4	5	4	5	4	4	5	5	5	5	4	1	5	5	5	5	5	4	5	5	5	5	5	5	5	5	5	5	4	4	4	4	4	3	4	4	5	5
2	21	1	3	2	5	5	4	4	5	5	5	3	5	1	1	1	1	1	1	1	1	1	4	4	3	3	4	3	5	3	1	1	1	1	1	1	1	2	1	1	1	1	2	1	1	3	4	4	5
2	20	2	10	2	5	5	3	4	5	5	3	3	4	1	1	1	1	1	1	1	1	1	4	5	5	5	5	5	5	2	2	3	1	1	1	1	1	1	1	1	1	1	1	1	1	1	4	4	4
2	21	1	3	2	3	3	4	3	4	3	4	3	3	2	3	3	3	3	3	4	3	3	5	5	3	3	2	3	3	5	4	4	4	5	3	5	5	3	4	3	2	2	3	3	2	2	1	4	4
2	21	1	2	2	4	5	3	4	4	4	3	4	4	2	1	2	2	3	2	2	1	2	4	4	2	3	4	4	5	4	4	3	3	3	3	2	3	3	3	3	4	4	4	3	4	4	4	4	4
2	22	2	13	2	3	5	4	5	5	5	5	5	5	2	3	1	1	2	1	3	1	1	5	5	5	3	3	4	5	4	3	2	2	1	2	3	2	5	3	3	3	3	3	3	3	3	3	3	3
2	22	2	4	2	5	5	5	3	5	5	5	5	5	2	1	1	1	1	1	1	3	1	5	5	5	5	4	5	5	3	2	2	3	1	1	1	1	2	2	1	2	1	1	2	1	1	5	5	5
1	22	2	10	2	4	4	5	5	5	3	4	4	4	1	1	1	1	1	1	1	1	1	4	4	3	4	4	4	5	2	4	3	3	2	1	1	1	3	3	2	2	3	2	2	2	2	2	2	3
1	20	1	7	2	1	1	1	1	1	1	1	1	1	1	3	1	1	1	1	1	1	1	1	5	5	3	5	1	3	3	3	3	3	3	3	3	3	3	2	3	3	3	3	3	3	3	3	3	3
2	20	2	8	2	3	4	3	3	3	1	2	4	4	1	1	1	1	3	1	2	2	1	3	3	3	3	4	3	5	4	3	3	3	2	1	2	2	3	2	1	2	2	3	3	3	1	2	2	2
2	20	1	2	2	4	5	4	5	4	5	4	5	5	2	2	1	1	2	1	2	2	1	3	3	4	3	3	3	5	3	3	4	2	2	1	2	2	2	2	2	2	2	1	1	2	2	4	5	5
1	21	1	7	2	5	4	3	4	5	4	4	5	5	2	1	1	1	1	1	1	2	1	5	5	5	4	5	4	5	2	2	2	1	1	1	2	1	3	2	2	2	1	2	1	2	1	5	5	5
1	21	1	8	2	4	4	4	3	4	3	4	3	5	3	1	1	2	2	1	1	1	3	3	1	3	5	3	2	5	3	1	1	2	1	1	3	3	1	2	3	3	4	2	2	3	3	2	3	4
1	20	2	7	2	5	5	3	5	5	5	5	5	5	1	1	1	1	1	1	1	2	1	3	5	3	5	4	1	5	4	1	1	1	1	1	1	2	1	2	1	1	1	1	1	2	1	5	5	5
1	22	1	7	2	4	5	3	4	5	4	4	5	4	1	1	1	1	2	1	1	1	1	4	5	5	4	3	3	5	2	4	3	3	4	3	3	3	3	3	5	2	3	4	4	3	1	2	3	2
2	19	1	6	2	5	5	5	5	5	5	4	5	5	1	1	1	1	3	1	4	1	1	5	5	5	5	5	2	5	2	2	1	1	2	1	1	1	1	2	2	2	1	1	1	1	2	5	5	5
1	23	1	3	2	3	4	3	3	3	3	3	3	4	1	1	1	1	1	1	1	1	1	3	4	5	4	4	3	5	3	2	3	3	3	1	2	1	1	1	1	1	1	1	1	1	1	1	4	4
2	22	1	10	2	4	4	5	5	4	5	3	4	4	1	1	1	1	1	1	1	1	1	5	5	5	5	4	5	5	2	3	3	5	1	1	2	1	2	1	1	1	1	1	1	1	3	5	5	5
1	20	2	10	2	3	3	4	4	4	3	4	3	5	1	1	1	1	1	2	1	1	1	4	4	2	3	3	4	4	3	2	2	3	1	1	2	2	1	1	1	2	1	1	2	1	1	5	5	5
2	20	1	8	2	3	1	2	4	5	5	4	4	5	1	1	1	1	1	1	1	1	1	4	3	3	4	4	3	4	3	1	1	2	1	3	1	1	1	1	1	3	2	1	3	1	2	5	5	5
1	20	2	3	2	5	5	5	4	4	4	3	5	5	2	1	2	1	1	1	1	1	1	5	5	4	5	4	4	5	4	2	1	1	2	1	2	2	3	1	2	2	2	2	2	2	2	5	5	5
2	19	1	9	2	5	5	5	5	5	5	5	5	5	1	1	1	1	1	1	1	1	1	3	4	3	4	5	3	5	3	3	2	1	4	1	2	1	3	3	1	2	2	1	1	2	2	4	5	5
2	22	1	4	2	3	5	5	5	4	4	2	5	5	1	3	1	1	3	1	5	1	3	4	3	4	4	2	5	5	5	5	4	1	5	2	4	4	3	3	4	3	3	4	1	5	3	5	5	5
1	19	1	8	2	2	4	4	3	3	3	2	4	2	2	1	1	1	1	1	1	1	1	5	3	3	4	4	3	4	4	3	2	3	1	1	2	2	3	2	3	3	3	2	2	2	2	4	4	4
1	21	2	5	2	2	3	3	4	4	3	5	4	4	2	1	2	1	3	1	2	1	2	2	3	4	3	3	4	4	2	2	2	3	1	2	2	2	2	2	2	2	2	1	1	2	3	5	5	5
2	20	1	8	2	4	4	4	4	4	5	4	4	4	1	1	1	1	1	1	1	1	1	5	5	5	5	5	5	5	4	3	4	3	1	1	3	1	1	3	1	3	3	1	1	1	1	4	5	4
1	20	2	5	2	3	4	4	5	4	4	3	4	5	1	1	1	1	1	1	1	1	1	4	5	5	5	5	5	5	3	3	2	2	2	3	2	2	3	2	2	2	2	1	2	3	2	4	5	4
1	20	2	5	2	3	4	4	5	4	4	3	4	5	1	1	1	1	1	1	1	1	1	4	5	5	5	5	5	5	3	3	2	2	2	3	2	2	3	2	2	2	2	1	2	3	2	4	5	4
1	22	2	6	2	2	3	1	4	2	1	1	5	3	1	3	1	2	5	5	1	2	3	3	5	5	5	4	1	4	4	4	4	4	1	5	1	2	4	2	3	4	1	3	2	3	1	1	3	3
1	21	1	9	2	3	3	4	3	3	3	2	3	4	2	3	1	3	1	2	1	1	1	4	4	5	4	4	4	4	4	3	3	3	1	2	2	2	2	4	3	3	3	2	3	2	3	4	4	3
1	21	2	9	2	4	4	3	4	4	4	3	4	4	2	1	2	2	2	1	2	2	2	3	4	3	4	4	4	4	3	4	3	3	2	2	3	3	3	3	3	3	3	4	4	4	4	5	4	4
2	22	2	12	2	5	5	4	5	5	3	3	5	5	1	1	2	1	1	1	1	1	2	5	5	5	3	4	5	5	4	3	5	3	4	2	3	2	3	3	2	2	2	2	2	2	2	5	5	5
1	21	1	11	2	2	2	2	2	2	2	1	1	2	2	2	2	3	3	3	3	2	2	2	5	4	3	3	3	3	1	2	2	2	1	2	2	1	2	1	1	2	2	1	2	2	2	2	2	2
1	20	2	5	2	3	4	4	5	4	4	3	4	5	1	1	1	1	1	1	1	1	1	4	5	5	5	5	5	5	3	3	2	2	2	3	2	2	3	2	2	2	2	1	2	3	2	4	5	4
1	20	2	5	2	3	4	4	5	4	4	3	4	5	1	1	1	1	1	1	1	1	1	4	5	5	5	5	5	5	3	3	2	2	2	3	2	2	3	2	2	2	2	1	2	3	2	4	5	4
2	20	1	8	1	5	5	5	5	5	4	3	5	5	2	1	2	1	2	1	3	3	3	4	5	5	4	3	3	4	4	3	4	2	2	3	3	3	3	3	3	3	3	3	3	2	4	3	4	5
1	21	1	11	2	4	5	4	3	5	5	1	5	5	1	1	1	2	2	1	3	2	3	4	4	4	4	4	3	5	3	4	4	1	2	1	2	3	2	2	2	3	4	3	3	3	5	3	4	5
2	20	1	5	2	5	5	4	4	5	5	5	5	5	1	1	2	2	2	2	1	1	1	5	5	5	4	4	3	5	5	3	2	4	1	1	2	1	2	1	1	3	2	2	2	2	2	5	5	5
1	20	1	10	2	5	5	5	5	5	4	4	4	5	3	1	2	1	2	1	1	1	1	5	5	4	5	5	3	5	5	3	3	4	1	2	2	2	1	3	2	2	3	2	1	2	2	3	5	5
1	19	2	9	2	4	5	2	4	5	1	1	2	5	1	1	3	1	1	4	3	2	2	2	4	3	1	2	4	5	4	5	3	1	1	1	4	1	3	3	1	3	2	4	4	3	1	5	5	4
2	18	1	9	2	5	5	5	5	5	5	5	5	5	2	1	1	1	1	1	1	1	1	4	5	4	4	4	4	5	3	3	2	5	1	1	1	1	1	1	1	1	1	1	1	1	1	5	5	5
2	18	1	5	2	4	4	3	2	3	3	2	3	5	2	1	2	1	2	1	1	1	2	3	4	3	4	4	2	4	5	4	4	1	4	2	2	2	1	2	2	2	2	2	3	2	2	5	4	3
1	18	2	8	2	5	5	5	4	5	4	4	5	4	1	1	1	1	2	1	2	1	1	4	5	3	5	4	4	5	3	2	2	2	1	1	1	2	1	1	1	1	2	1	1	1	2	4	5	5
2	18	2	5	2	5	5	4	5	5	5	5	5	5	1	1	1	1	1	1	2	1	1	5	5	4	4	5	4	5	2	1	2	3	1	1	1	1	3	1	1	1	1	1	1	1	1	3	5	5
2	20	2	3	2	4	5	2	3	5	3	5	5	5	2	1	1	1	1	1	1	1	1	4	4	4	4	3	4	5	3	4	2	3	2	1	2	1	4	4	4	3	2	5	5	2	2	5	5	5
2	19	1	4	2	5	5	4	5	5	4	5	5	5	2	2	1	2	3	1	1	1	2	3	4	2	4	3	2	4	5	4	3	1	4	1	3	1	1	3	2	3	2	2	5	3	3	5	5	5
2	18	2	8	2	5	5	5	4	5	4	4	5	5	1	1	1	1	1	1	1	1	1	5	5	5	4	5	4	5	3	3	3	3	1	3	3	1	5	1	1	1	3	1	1	1	3	5	5	5
1	19	1	7	2	4	4	4	3	4	4	3	5	4	2	1	3	2	1	1	1	1	3	4	5	4	5	5	4	5	3	2	1	2	1	1	1	3	3	2	2	2	1	1	2	1	1	4	5	5
2	19	1	5	2	4	3	3	5	5	3	5	4	5	2	1	1	1	2	1	1	1	1	3	4	3	3	3	3	4	4	4	2	1	4	1	1	1	1	2	1	2	1	1	1	2	2	4	4	4
2	30	1	2	2	3	5	5	5	5	5	3	4	5	1	1	1	1	2	1	5	2	1	5	5	5	4	5	3	5	4	3	2	2	2	1	2	1	1	1	2	1	2	4	3	2	1	5	5	5
1	29	2	15	1	3	3	3	3	4	3	3	3	3	3	3	3	3	3	3	3	3	3	3	3	3	2	3	4	2	1	2	2	2	2	2	2	2	2	2	2	2	2	2	2	2	2	2	2	2
1	19	1	3	2	3	4	2	4	4	3	4	3	5	2	2	2	2	2	2	4	3	2	4	4	3	3	3	2	4	5	1	2	3	1	2	2	1	3	2	2	2	2	2	1	1	1	4	3	4
1	18	1	7	2	5	5	1	5	5	5	4	5	5	1	1	1	1	2	1	1	1	1	5	5	4	5	5	4	5	2	1	1	1	1	1	1	3	2	2	1	1	1	1	2	1	1	3	5	5
1	19	2	7	2	2	4	4	3	4	3	5	5	5	2	1	1	1	3	2	1	2	3	3	5	4	5	4	3	5	4	3	1	1	1	1	1	1	3	2	2	2	1	4	4	1	2	5	5	5
1	21	1	6	2	5	4	4	3	3	3	2	4	4	4	1	1	1	2	1	2	2	2	4	5	3	3	5	5	5	3	2	2	1	3	2	2	3	1	1	1	1	3	3	3	3	3	3	3	4
2	18	1	3	2	4	5	2	4	4	4	3	3	4	1	1	1	1	2	1	4	1	1	4	3	3	3	3	3	4	5	2	2	2	2	1	2	1	2	3	2	3	2	1	2	1	2	4	5	4
1	26	2	15	2	5	5	5	5	5	5	5	5	5	1	1	1	1	1	1	1	1	1	5	5	5	5	5	5	5	2	1	1	1	1	1	1	1	1	1	1	1	1	1	1	1	1	5	5	5
1	19	1	5	2	1	4	1	1	1	1	5	5	1	1	5	5	5	5	1	1	1	5	1	1	1	1	1	3	2	2	5	1	1	1	1	1	5	5	5	5	5	5	5	5	1	1	5	5	5
2	19	2	6	2	5	5	3	5	4	4	5	3	5	1	1	1	1	2	1	1	3	2	4	4	5	3	3	3	3	3	3	1	2	1	1	2	2	2	2	2	2	2	2	2	2	2	5	5	5
1	20	2	8	1	5	5	5	5	5	5	5	5	5	2	1	1	2	2	1	1	1	1	5	4	4	4	4	3	4	4	2	2	2	3	2	2	2	1	1	2	3	3	3	3	3	2	4	5	5
2	18	1	8	2	3	4	3	2	4	4	3	3	3	3	3	3	3	3	3	3	3	4	4	4	4	4	4	4	5	3	3	3	3	3	3	3	3	3	3	3	3	3	3	3	3	3	3	3	3
2	19	2	7	2	4	5	4	4	4	4	4	3	4	2	1	1	1	1	1	1	1	1	4	4	4	4	5	4	5	2	1	1	3	1	1	1	1	1	1	1	2	1	2	1	1	1	4	5	5
2	18	1	6	2	5	5	5	5	5	5	3	3	5	1	1	1	1	1	1	1	1	1	5	5	5	5	5	5	5	2	1	1	5	1	1	1	1	1	1	1	1	1	1	1	1	1	5	5	4
1	19	2	3	2	3	5	2	2	4	1	4	3	5	2	1	1	1	1	3	2	5	2	2	4	3	1	1	4	5	4	5	5	1	1	2	4	1	4	3	1	1	1	3	4	4	3	4	5	3
1	18	2	8	2	3	5	4	3	5	1	4	3	4	1	1	2	2	2	1	1	2	2	5	5	3	4	4	3	4	5	3	3	1	2	2	2	2	3	1	2	3	2	2	5	3	1	5	5	5
1	18	2	2	2	5	5	3	4	4	4	5	4	5	1	1	1	1	2	1	1	1	1	3	4	5	3	3	4	4	3	2	2	1	1	1	1	1	2	1	1	1	1	1	1	1	2	4	5	5
2	19	1	6	2	5	5	4	4	4	3	4	4	5	1	1	1	1	2	1	4	1	1	5	5	4	3	3	3	4	4	4	3	2	2	1	1	2	2	2	1	2	3	2	2	2	2	4	4	5
1	20	2	8	1	5	5	5	5	5	5	5	5	5	1	1	1	1	1	1	1	1	1	5	5	4	4	4	3	5	4	2	2	1	2	1	2	2	1	1	2	1	2	1	2	2	2	5	5	5
1	19	1	8	2	4	4	4	3	4	3	3	3	4	2	1	2	1	1	1	1	2	2	5	4	4	5	5	3	5	2	2	2	2	1	2	1	3	3	2	3	2	2	2	3	2	1	4	4	4
2	19	2	6	2	5	5	4	5	5	4	5	5	5	1	1	1	2	2	1	1	2	2	3	3	3	2	2	3	3	4	2	1	2	1	1	2	2	2	2	2	2	2	2	2	2	2	4	4	5
1	18	1	7	1	5	5	3	5	5	5	4	5	5	1	1	1	1	2	1	1	1	2	4	5	5	5	4	4	5	2	2	1	2	1	1	1	2	3	3	1	2	1	1	3	2	1	3	5	4
1	18	2	6	2	4	4	3	4	4	5	5	4	3	1	1	2	1	2	1	1	1	3	4	4	4	4	3	4	3	4	3	3	3	2	3	4	3	3	2	1	1	4	2	5	2	1	4	5	5
1	19	2	9	2	4	5	3	4	4	4	3	4	5	1	1	1	1	1	1	1	1	1	4	4	5	3	4	5	5	2	2	1	1	1	1	1	1	2	1	1	1	2	1	2	1	1	2	4	5
2	18	1	3	2	4	4	2	4	4	3	2	3	5	1	1	1	1	3	1	2	1	1	4	4	3	4	4	3	4	4	2	2	2	2	1	2	2	1	2	2	2	2	2	2	2	3	4	4	4
1	19	2	10	2	2	3	4	4	3	3	4	5	5	2	1	1	1	3	1	1	2	1	3	5	4	5	4	3	4	3	4	2	1	2	1	3	2	3	3	2	3	2	4	3	2	1	5	5	5
2	18	1	5	2	5	5	4	4	4	4	3	4	5	2	1	2	2	4	2	1	2	3	4	4	2	3	4	3	4	3	4	3	2	3	2	2	2	2	2	3	2	2	2	2	2	2	4	4	4
1	19	2	7	2	5	5	3	5	5	5	1	5	5	1	1	1	1	3	1	3	1	1	5	5	3	5	5	5	5	5	3	3	3	1	1	3	1	1	3	1	1	2	1	2	1	2	5	5	5
2	18	2	8	2	5	5	5	5	5	5	5	5	5	5	5	5	5	5	5	5	5	5	5	5	5	5	5	5	5	3	1	1	2	1	1	1	1	1	1	1	1	1	1	1	1	1	1	1	1
2	19	1	5	2	4	4	3	4	5	4	2	3	4	1	1	1	1	1	1	2	1	1	4	4	5	4	4	4	4	3	3	2	1	4	1	2	1	3	3	2	2	1	1	2	2	2	5	5	4
2	18	2	6	2	5	5	5	5	5	4	4	5	5	1	1	1	1	1	1	1	1	1	5	5	5	5	5	3	5	3	2	1	1	1	1	1	1	3	2	1	1	1	1	1	1	1	3	5	5
1	18	2	8	2	3	4	4	4	4	3	3	5	5	2	1	1	1	2	2	1	1	2	3	4	4	4	3	5	4	3	3	2	1	1	2	2	1	4	1	2	2	2	2	1	2	1	4	4	5
2	18	2	4	2	2	5	3	3	5	2	4	5	5	1	1	2	3	2	1	4	2	1	5	5	4	3	5	5	5	4	4	3	2	1	1	1	2	3	2	3	4	2	1	1	2	2	5	5	5
2	19	1	2	1	5	5	4	4	5	5	2	4	4	1	1	2	3	2	1	3	1	1	4	4	3	4	4	3	4	4	4	2	3	3	3	3	2	2	3	2	3	3	2	3	3	3	3	4	4
1	19	2	8	2	5	5	4	4	4	3	5	5	5	1	1	1	1	3	1	1	1	3	3	3	2	4	3	1	5	3	4	4	2	1	1	4	3	3	4	4	3	4	1	4	3	4	5	5	4
2	18	1	10	1	5	5	4	4	4	3	3	5	2	2	2	2	4	5	1	1	2	2	3	4	3	4	2	3	4	3	4	4	5	3	5	4	3	5	5	3	4	2	2	5	3	2	5	4	5
2	18	2	5	2	4	3	3	2	4	3	3	3	4	2	2	2	2	3	3	3	2	3	3	4	3	3	3	3	3	4	4	3	2	3	3	3	3	3	3	3	3	3	3	3	3	3	3	3	3
1	20	1	6	2	4	4	3	4	5	3	4	4	5	3	2	2	2	3	1	2	3	2	5	4	4	3	3	3	4	4	4	3	2	3	1	3	4	3	4	3	3	3	3	3	4	4	5	5	5
2	18	2	8	2	4	4	4	4	3	3	2	5	4	1	1	1	2	2	1	5	2	2	4	4	3	5	5	4	5	4	2	1	5	1	1	3	2	4	2	3	2	2	2	2	3	1	5	5	5
1	21	1	8	2	5	5	3	5	5	5	4	5	5	1	1	1	1	1	1	1	1	1	5	5	4	4	5	4	5	1	2	2	2	1	1	2	1	2	1	1	1	1	1	1	1	1	5	5	5
1	19	1	7	2	5	5	5	5	5	4	5	2	5	2	1	1	1	3	1	1	1	2	4	5	3	2	3	5	4	4	4	3	1	1	1	2	2	1	1	2	1	2	1	3	2	1	5	5	5
1	21	1	2	2	5	5	4	5	5	5	5	5	5	1	5	1	1	3	3	5	5	5	1	1	1	1	1	1	1	3	3	3	3	3	3	3	3	1	2	4	4	4	3	3	3	3	3	3	3
1	22	2	4	2	3	3	3	4	4	2	4	1	2	2	2	2	2	3	2	3	3	3	3	4	4	4	3	4	2	4	4	4	3	5	2	3	2	3	4	4	2	3	3	2	2	5	4	3	2
1	22	1	7	2	1	3	2	2	3	2	1	1	1	1	2	2	2	2	2	3	2	3	3	2	3	3	3	2	3	3	3	3	2	3	3	2	3	2	3	2	3	2	3	2	3	2	3	2	3
2	21	2	4	2	3	4	4	4	5	3	2	5	3	3	4	3	2	1	1	2	1	2	3	3	5	3	4	3	5	3	4	2	4	3	3	2	2	1	2	3	3	3	1	1	1	3	4	4	4
1	23	1	7	2	3	3	3	5	5	3	3	5	3	1	1	1	1	1	1	5	1	1	5	5	5	5	1	5	5	3	3	2	2	2	1	1	1	1	1	1	1	1	3	1	1	1	1	1	1
1	21	2	9	2	3	4	1	2	5	1	5	3	3	1	3	3	1	3	3	5	1	3	5	5	5	5	5	5	5	5	3	3	3	1	1	1	2	1	1	1	1	1	1	1	1	1	1	1	1
2	22	1	12	2	4	5	2	4	5	4	4	4	4	3	1	1	3	3	2	3	3	3	1	3	3	2	1	4	5	5	5	4	4	5	1	4	3	4	4	4	4	2	4	4	4	4	5	5	5
1	21	2	5	2	4	4	5	5	5	5	5	4	3	4	4	5	5	5	4	4	4	5	5	3	3	4	5	4	5	5	5	4	5	4	5	5	5	5	5	5	5	4	5	5	5	4	5	5	5
1	21	1	10	2	4	4	2	3	5	3	3	3	3	1	1	1	2	2	1	1	2	2	4	5	5	5	4	3	5	3	1	1	3	2	1	1	4	2	3	2	2	2	2	2	2	2	2	2	2
1	20	2	6	2	3	2	4	3	3	2	1	4	4	3	4	2	2	3	1	3	1	1	5	5	5	5	5	5	5	2	2	2	2	1	1	4	1	5	2	3	1	3	1	3	2	3	3	2	4
1	21	2	4	2	3	4	4	4	4	4	3	4	4	1	1	1	1	1	1	1	1	1	4	5	5	5	5	5	5	4	4	1	1	1	1	1	1	1	1	1	1	1	1	1	1	1	5	5	5
2	20	1	5	2	4	5	3	4	5	3	2	5	5	1	1	1	1	2	1	1	1	1	5	5	4	4	3	4	5	5	3	2	2	5	1	2	1	2	2	2	2	1	2	2	2	2	2	5	5
1	21	1	7	2	4	5	4	3	3	4	2	4	3	1	1	1	1	2	1	1	1	1	4	5	3	5	3	3	5	5	3	2	2	3	3	2	1	2	1	2	2	3	1	3	4	4	4	4	4
1	22	2	6	2	4	4	2	1	4	4	4	3	5	1	1	1	1	2	1	2	2	1	4	4	4	3	4	4	4	3	4	3	2	2	4	3	3	3	4	4	3	3	2	3	2	3	4	4	3
2	20	2	7	2	4	4	2	4	3	3	2	4	5	2	1	1	1	2	1	1	2	3	3	3	3	3	2	4	4	5	3	2	4	5	3	3	3	4	4	2	2	1	3	3	3	1	4	5	5
2	34	1	10	1	5	4	4	5	4	4	3	4	5	2	1	1	1	1	2	1	1	1	3	5	4	4	5	3	5	4	4	3	2	1	1	1	1	2	2	1	1	2	3	2	2	3	4	5	5
2	20	1	7	2	4	5	4	4	5	5	5	4	4	2	1	1	1	1	1	1	1	1	5	5	5	5	5	3	5	4	3	3	2	1	1	3	2	3	2	2	3	2	1	1	2	2	5	5	5
1	21	2	7	2	4	4	4	5	4	4	3	4	4	2	2	2	2	2	2	2	2	2	4	5	4	5	5	5	5	4	3	3	3	1	3	3	3	2	3	3	2	2	3	3	3	3	3	4	2
1	21	1	6	2	5	5	4	5	5	4	4	5	5	1	1	1	1	1	1	1	1	1	5	5	3	4	5	4	5	1	1	1	1	1	1	1	1	1	3	1	1	2	1	1	1	1	5	5	5
2	21	2	11	2	3	4	2	2	4	3	2	3	2	2	1	1	2	2	1	1	2	2	3	3	3	4	3	2	3	4	4	4	2	4	2	3	2	2	4	3	2	2	4	2	3	4	4	4	4
1	21	1	4	2	3	4	3	4	4	3	2	4	4	2	2	4	3	1	1	4	2	2	4	4	3	4	3	4	5	3	2	3	4	1	3	2	1	3	2	3	4	3	1	2	4	4	4	4	4
1	20	2	2	2	3	3	4	2	3	1	2	2	4	2	1	2	1	2	2	3	4	2	2	3	4	4	3	4	4	3	2	2	2	2	1	2	2	2	3	2	3	2	1	1	3	3	4	4	4
2	18	1	9	1	5	5	4	5	5	5	5	5	5	2	1	1	1	1	1	1	1	1	5	5	5	4	4	4	4	2	3	3	4	1	4	3	2	2	3	3	2	4	4	3	3	1	4	5	5
1	18	1	6	1	5	5	5	5	5	5	5	5	5	1	1	1	1	1	1	1	1	1	5	5	4	5	5	4	5	5	3	2	2	1	1	1	1	1	1	1	1	2	1	1	1	1	5	5	5
1	35	1	24	1	5	5	4	5	5	5	5	5	5	1	1	1	1	3	1	1	1	2	5	5	5	5	5	3	5	4	4	2	1	2	1	1	3	5	2	2	1	1	3	3	1	1	5	5	5
1	13	1	3	2	3	4	2	4	4	5	3	4	5	3	1	3	1	2	2	1	2	3	4	4	5	3	4	4	5	4	2	3	3	1	2	2	4	2	3	4	3	4	3	2	2	1	4	4	4
2	18	1	9	1	4	4	3	4	3	3	3	3	5	2	3	3	2	5	3	5	2	3	3	3	4	3	4	3	4	5	4	3	3	1	4	3	4	3	4	3	4	3	3	3	3	2	5	4	4
1	18	1	8	1	4	4	4	3	3	3	3	4	5	2	1	1	2	3	1	1	1	1	3	4	3	3	3	3	5	3	2	2	1	1	1	2	2	1	2	1	2	2	2	2	2	1	4	4	4
2	25	1	6	1	4	4	3	3	4	4	3	4	5	3	1	2	1	3	1	3	3	3	5	4	3	3	4	3	5	3	3	2	3	1	1	2	3	4	4	4	4	1	5	5	5	2	5	5	5
1	18	1	2	1	4	4	3	3	4	4	4	4	4	3	3	3	3	2	1	1	1	2	4	4	4	4	4	4	4	4	5	2	2	1	1	3	3	2	2	4	2	3	5	2	3	2	4	4	4
1	24	1	4	1	4	3	3	3	4	2	1	2	3	1	1	1	1	2	1	1	1	1	4	5	5	4	5	4	5	2	1	5	1	1	1	1	1	2	1	2	3	2	1	1	1	2	5	5	5
1	22	1	4	1	5	5	3	5	5	4	5	5	5	1	1	1	3	3	1	3	2	1	5	5	3	4	5	5	5	5	4	4	4	5	1	4	1	1	4	1	3	2	1	5	2	1	5	5	5
2	22	1	3	1	5	4	2	4	5	5	4	5	3	2	1	3	1	2	1	3	2	3	5	4	5	4	5	5	5	4	5	2	1	1	3	3	4	3	2	4	5	5	2	1	3	1	5	5	5
2	24	1	4	1	2	4	1	2	4	2	1	1	1	4	5	4	4	4	1	3	5	5	3	3	4	3	3	4	4	5	5	5	5	5	2	5	4	2	4	5	4	3	5	2	3	5	4	4	2
1	18	1	4	1	4	4	4	5	4	3	3	5	5	1	1	1	3	2	1	1	2	2	5	4	4	4	5	5	5	5	2	1	1	5	2	1	3	1	4	2	1	2	1	1	3	4	5	5	5
2	25	1	3	1	4	4	2	5	4	4	4	3	4	4	3	3	3	4	1	3	3	3	4	4	3	4	4	4	4	4	3	2	3	1	1	4	4	2	3	5	4	2	1	2	5	1	4	4	5
2	24	1	5	1	4	4	3	4	4	4	4	4	4	3	3	2	2	3	3	2	3	2	4	4	3	3	3	3	4	4	4	1	2	3	2	3	2	2	4	4	4	3	4	3	4	3	4	4	4
1	26	1	3	1	4	5	5	3	5	5	5	5	3	2	3	1	2	3	1	1	1	1	3	5	3	3	4	4	4	5	2	5	3	1	1	1	1	2	3	2	3	2	4	3	2	5	5	5	5
2	18	1	3	1	4	4	4	4	4	3	4	5	4	2	2	1	1	1	1	1	1	1	4	4	4	4	4	3	5	4	3	3	2	1	1	3	1	3	2	4	4	3	4	3	3	2	3	4	4
1	22	1	2	1	5	5	3	5	5	5	3	5	4	2	3	1	2	4	1	2	2	1	5	3	5	3	5	5	4	4	4	2	2	1	1	2	1	1	3	2	2	1	2	2	2	1	5	5	5
2	23	1	3	1	4	4	3	4	4	3	3	4	4	2	2	1	1	1	1	1	1	1	4	3	3	3	4	4	5	3	2	1	1	1	1	3	1	1	2	2	3	2	2	2	2	1	4	4	4
2	22	1	2	1	5	4	4	5	5	5	5	5	4	3	2	1	2	1	1	1	1	1	4	4	4	5	5	4	5	3	2	2	2	1	1	1	1	1	2	2	3	1	1	1	2	1	5	5	4
1	22	2	5	2	5	5	5	5	5	5	5	4	5	1	1	1	1	2	1	1	1	1	4	5	5	5	5	5	5	4	2	3	1	1	1	3	1	4	2	1	1	2	1	1	3	4	4	5	5
1	21	1	12	1	4	5	5	4	4	5	1	3	1	5	4	4	5	3	3	3	5	5	5	5	5	5	5	3	5	1	3	3	3	1	1	4	1	1	2	1	1	3	1	1	1	3	3	5	4
2	23	2	12	2	5	4	3	4	3	3	4	3	5	2	1	1	1	2	1	1	2	2	5	4	4	4	5	5	5	3	2	2	1	2	1	2	2	1	2	1	2	1	2	2	2	3	4	4	4
1	20	2	4	2	3	3	2	2	2	3	1	5	4	2	1	3	1	5	1	1	1	3	3	4	5	3	4	5	5	5	5	3	1	3	1	2	3	1	2	3	2	1	1	1	2	5	5	5	5
1	19	1	10	2	5	5	5	5	5	5	4	5	5	2	1	1	1	1	1	1	1	1	3	5	5	5	5	5	5	2	3	1	1	1	1	1	1	3	1	1	1	1	1	1	1	2	5	5	5
2	20	2	9	2	4	4	5	4	5	5	5	5	5	2	1	1	1	3	1	4	1	1	4	4	5	3	4	5	5	3	3	3	1	1	2	2	1	2	3	2	2	2	2	4	3	4	5	5	4
2	19	1	8	2	4	5	5	5	4	3	2	2	4	2	1	2	4	3	3	3	3	3	4	4	3	3	4	3	5	4	4	4	2	2	2	3	3	3	3	3	2	2	4	4	4	2	4	4	3
1	20	1	12	1	3	4	3	4	4	2	4	4	4	1	1	1	1	1	1	1	1	1	3	4	4	4	5	5	5	2	3	4	3	3	2	2	2	4	2	3	3	2	1	2	2	1	5	5	5
2	20	2	5	2	4	4	3	4	4	5	3	3	5	3	1	1	1	1	2	4	3	3	4	4	4	4	3	4	4	4	4	3	2	4	2	2	3	2	2	3	3	2	2	4	3	3	4	4	4
1	24	2	11	2	5	5	5	5	5	5	5	1	5	1	1	1	1	1	1	1	1	1	5	5	5	5	5	5	5	3	1	1	1	1	1	1	1	1	1	1	1	1	1	1	1	1	5	5	5
1	19	2	10	2	3	4	4	3	3	3	5	3	4	1	1	1	1	1	1	1	1	1	2	2	4	4	5	4	5	3	2	1	1	3	1	3	1	1	2	2	2	1	1	2	1	1	3	5	5
2	19	2	7	2	5	5	3	5	5	4	2	4	5	1	1	1	1	1	1	1	1	1	4	4	4	3	3	3	5	3	4	3	2	3	1	1	1	2	1	1	2	1	1	1	1	3	5	5	4
2	18	2	5	2	5	5	5	5	5	3	3	5	5	1	1	1	1	1	1	1	1	1	5	5	3	3	4	3	5	5	5	2	1	5	1	5	1	5	5	5	5	5	5	5	5	5	5	5	5
2	18	2	4	2	2	3	3	4	3	3	3	3	4	1	1	1	2	2	1	1	2	1	3	4	3	4	4	3	5	3	2	2	1	1	1	2	1	2	2	2	3	2	1	2	1	1	4	4	4
1	19	2	14	2	5	5	1	4	5	4	2	5	5	1	1	1	1	1	1	1	1	1	4	4	5	4	3	5	5	2	3	2	3	1	1	1	1	1	1	1	1	1	1	1	1	1	5	3	5
2	18	1	3	2	4	4	2	4	3	2	3	4	3	2	2	2	2	4	2	3	1	2	3	3	2	4	2	1	5	5	5	4	1	3	1	3	3	2	3	2	2	2	3	3	2	4	4	5	5
2	18	1	3	2	5	4	3	5	5	5	2	2	5	2	1	1	1	2	1	1	1	1	4	4	4	4	4	4	4	2	2	2	3	2	1	2	2	2	2	1	2	1	1	2	1	1	3	5	4
2	18	1	4	2	3	5	3	2	5	4	3	4	5	2	2	2	3	3	1	3	3	2	4	5	4	4	4	2	4	4	4	3	2	4	1	3	1	1	3	2	4	2	4	3	3	4	5	5	5
2	19	1	6	2	4	5	4	5	5	5	3	4	4	1	1	2	1	2	1	1	1	1	2	3	3	3	3	4	4	4	3	2	2	1	2	2	2	2	2	2	2	2	2	2	2	2	4	4	4
2	18	1	3	2	4	4	3	4	3	2	2	3	4	1	1	1	1	4	1	3	2	3	3	3	2	2	3	3	3	4	3	3	3	2	1	2	2	1	2	2	2	2	3	3	3	3	4	4	4
2	19	1	1	2	4	4	4	4	4	4	3	4	4	1	1	1	1	2	1	3	3	1	4	4	4	4	4	4	5	4	3	3	2	4	1	3	1	3	3	2	1	2	1	2	3	2	4	4	4
2	19	1	6	2	4	4	3	4	3	3	4	4	2	5	1	1	2	1	1	1	1	2	4	4	3	3	3	3	4	4	4	3	1	1	1	2	2	2	3	1	3	1	1	3	2	1	5	5	5
1	23	2	8	2	3	4	4	3	4	4	4	4	3	4	3	3	4	3	2	4	4	3	4	4	4	3	3	3	4	3	4	5	3	4	3	2	2	4	3	4	5	4	5	2	4	3	3	4	5
2	20	2	1	2	4	3	4	3	4	4	3	4	3	4	4	4	2	2	3	4	2	3	3	4	5	4	3	3	4	4	4	3	5	3	4	5	5	5	5	2	4	3	5	3	2	2	3	3	3
2	22	2	6	2	4	4	3	4	5	4	3	4	4	2	1	1	1	1	1	2	2	3	5	5	5	5	3	5	5	3	3	4	2	2	3	5	2	2	1	1	1	1	1	1	1	1	3	4	5
1	21	1	6	2	4	5	4	4	5	5	4	5	5	2	2	1	1	1	1	1	1	1	3	3	3	2	3	3	4	4	3	3	3	1	1	1	1	1	1	1	1	1	1	1	1	1	1	1	1
1	23	1	13	2	3	2	2	2	5	1	1	1	1	1	1	1	1	1	2	4	5	4	4	4	2	3	2	2	5	3	4	4	2	4	3	2	4	4	1	1	1	5	1	3	4	2	1	5	5
1	20	2	4	2	3	3	3	3	3	3	3	3	3	3	3	3	3	3	3	2	2	2	2	4	4	4	3	3	4	2	3	3	2	2	1	3	2	2	3	3	2	2	3	3	3	3	3	3	3
2	19	1	3	2	4	4	5	5	5	4	3	4	5	1	1	1	1	1	1	1	1	1	5	5	4	4	4	5	5	3	2	1	1	1	1	1	1	1	1	1	1	1	1	1	1	1	5	5	5
2	29	2	2	2	3	4	2	3	4	4	1	4	5	2	1	1	1	1	1	1	1	1	4	4	4	4	4	4	5	5	2	2	2	3	2	2	1	3	3	3	3	3	3	3	3	3	3	3	3
2	23	1	13	2	4	3	3	3	5	4	3	3	3	2	1	1	2	3	1	1	1	3	3	2	3	4	3	2	5	3	3	3	2	1	2	3	3	3	3	2	3	3	3	3	3	3	3	2	3
1	20	2	3	2	5	5	5	4	4	4	5	5	4	3	1	3	1	2	1	1	1	1	4	5	3	3	2	1	5	5	4	4	2	1	1	2	1	3	1	2	1	3	1	2	3	1	3	1	2
2	20	1	7	2	3	5	1	3	5	3	5	3	5	1	1	1	1	1	1	1	1	1	2	3	3	1	2	1	5	3	1	1	3	1	1	1	1	3	1	1	1	1	1	1	1	1	5	5	5
1	26	2	14	2	4	5	5	4	4	3	2	5	5	2	1	1	1	3	1	1	1	1	4	5	4	4	2	3	5	4	3	3	2	1	1	3	2	2	3	1	2	1	2	1	2	3	4	5	4
1	20	2	7	2	4	4	4	4	5	4	3	3	5	1	1	2	1	1	1	1	1	1	5	4	4	4	5	3	5	3	2	1	3	1	1	1	2	2	2	3	2	2	1	2	2	1	5	5	5
2	21	2	2	2	4	4	3	4	4	3	3	3	3	2	1	1	1	2	3	4	2	2	4	4	4	4	4	3	4	4	3	3	3	3	2	2	3	3	3	3	3	3	3	2	2	3	4	4	4
2	20	1	8	2	4	4	3	4	4	3	3	4	4	1	1	1	1	3	3	1	1	1	4	4	4	4	4	4	4	4	3	3	2	2	2	3	2	3	2	2	3	3	3	2	2	2	5	5	5
2	20	2	5	2	2	3	4	4	3	3	4	4	5	2	1	2	1	3	3	3	3	3	5	5	5	5	5	3	5	5	3	4	1	3	5	3	3	3	5	5	4	4	3	3	3	3	3	5	5
1	23	2	13	2	1	1	2	2	2	2	2	2	4	1	1	1	3	1	1	4	1	1	3	4	4	3	4	4	5	4	2	1	2	1	1	1	1	2	1	1	1	1	1	1	1	1	1	2	2
1	20	2	5	2	4	4	4	5	4	2	5	5	4	1	1	1	1	1	1	2	1	1	4	5	4	4	4	4	5	2	1	1	1	1	2	2	2	2	1	2	1	2	2	3	1	2	5	5	5
1	25	2	8	2	4	4	5	5	3	3	2	5	4	5	1	1	1	2	3	3	1	1	5	5	5	5	5	5	5	1	1	1	2	2	5	1	5	3	3	5	3	5	5	1	1	1	5	5	5
1	20	2	12	2	3	4	3	3	4	4	3	4	4	2	2	3	2	2	1	2	2	1	3	4	3	3	4	4	4	3	3	4	3	1	3	2	2	3	3	2	2	2	3	3	2	3	5	5	5
2	21	1	6	2	4	4	3	3	4	3	4	4	4	2	1	2	3	3	2	2	3	3	3	3	4	2	3	4	4	4	5	4	3	2	3	2	3	2	4	4	4	3	4	4	4	4	2	4	4
2	18	1	9	2	3	3	1	3	3	4	4	3	5	1	1	2	2	5	1	1	2	1	4	3	2	3	2	2	5	2	4	2	1	2	1	1	1	2	2	2	2	2	1	2	2	1	5	5	5
2	19	1	11	1	5	5	4	5	4	4	5	5	5	2	1	1	1	3	2	1	1	1	3	4	5	5	5	4	4	2	2	1	2	1	1	1	1	2	2	1	2	3	2	1	1	1	5	5	5
1	20	2	12	2	5	5	5	5	5	5	5	3	5	1	1	1	1	1	1	1	1	1	5	5	5	5	5	2	5	3	3	1	2	1	1	2	1	2	1	1	1	1	1	1	1	1	3	3	4
2	20	1	8	2	4	4	2	4	5	2	2	5	4	2	1	1	1	2	1	1	1	1	5	5	4	4	4	3	5	4	4	4	1	1	1	3	3	2	2	3	4	3	2	2	3	2	5	5	5
2	18	2	6	2	5	5	5	5	5	5	5	5	5	2	1	2	1	2	1	2	1	1	4	4	4	3	3	4	4	3	2	2	1	4	1	1	1	2	3	3	2	2	1	2	2	2	2	4	5
2	26	2	12	2	5	5	5	5	5	5	3	4	5	1	1	1	1	1	1	1	1	1	5	5	5	5	5	5	5	2	2	1	3	2	1	2	1	1	1	1	1	1	1	1	1	1	5	5	5
1	22	1	9	1	5	5	4	5	5	5	5	5	5	2	1	1	1	2	1	1	1	1	3	5	3	4	4	4	5	3	2	1	1	2	1	2	1	1	2	1	1	2	1	1	2	2	5	5	5
1	23	2	10	2	3	5	4	4	5	3	2	1	5	1	1	1	1	1	1	1	1	1	3	5	4	4	5	2	5	4	1	1	2	1	3	1	1	1	1	1	1	1	1	1	1	1	5	5	5
2	18	2	1	2	4	5	5	4	4	3	5	4	4	3	3	2	1	2	1	5	1	1	4	4	4	3	4	4	4	3	1	1	1	1	1	2	1	2	2	3	2	2	3	4	2	3	4	5	5
1	20	2	7	2	5	4	3	3	4	5	3	5	4	2	1	1	1	4	2	2	1	4	1	1	1	3	5	4	5	3	4	4	3	1	1	2	1	2	3	2	2	4	3	2	2	1	5	5	4
1	22	2	10	2	5	5	3	5	5	5	5	5	4	1	1	1	1	1	1	1	1	1	4	5	5	5	4	4	5	3	4	4	1	1	2	1	1	1	1	2	1	1	1	1	1	5	5	5	5
2	18	2	8	2	5	5	4	5	5	5	4	4	5	1	1	1	1	2	1	1	1	1	5	5	5	4	4	5	5	3	4	2	1	2	1	1	1	2	1	1	1	1	2	1	1	2	5	5	5
1	20	2	10	2	5	5	2	4	5	3	5	5	5	1	4	3	1	3	4	3	2	2	1	4	3	5	5	1	5	5	5	5	2	1	4	5	5	5	5	5	5	5	5	4	5	5	5	5	5
1	20	2	5	2	3	3	4	4	2	3	4	4	5	4	3	3	4	2	3	3	4	2	3	3	3	3	3	3	4	2	3	3	4	2	3	3	4	3	4	2	3	2	3	3	4	3	2	3	4
1	22	2	8	1	5	5	5	5	5	5	2	5	5	5	5	3	5	5	2	2	4	4	5	5	5	5	5	5	5	5	2	2	2	2	2	2	3	4	1	1	2	2	2	2	2	3	4	3	5
1	20	1	9	2	3	4	3	4	3	4	3	4	5	3	4	5	3	5	3	4	3	3	3	3	4	3	4	3	4	3	4	2	3	4	2	3	4	3	2	5	3	4	5	3	4	3	4	5	1
2	20	2	9	2	4	3	3	3	4	5	4	4	4	1	1	1	1	1	1	1	1	1	4	5	5	4	4	4	5	3	3	1	2	2	1	1	1	2	1	1	1	1	1	1	1	2	4	4	5
2	19	2	9	2	2	4	3	3	4	3	2	2	3	1	1	1	2	3	2	1	4	1	3	4	3	4	2	3	5	2	1	1	1	1	1	2	2	1	2	2	2	3	3	4	3	1	5	5	5
1	20	2	10	1	5	5	5	4	5	3	4	5	3	1	1	1	1	1	1	1	1	1	3	3	3	3	4	4	3	2	2	2	2	1	1	2	2	1	1	1	1	1	1	1	1	1	3	3	5
1	21	1	8	2	2	3	3	3	3	3	3	3	3	3	3	3	3	3	3	3	3	3	3	3	3	3	3	2	5	3	3	2	3	5	1	3	3	2	3	4	3	2	3	4	3	2	3	3	3
1	19	2	2	2	5	4	2	3	4	3	3	5	5	1	1	1	1	1	2	1	1	1	5	5	3	5	5	3	4	2	2	2	2	1	1	2	2	1	1	1	1	1	1	1	1	4	5	5	5
1	27	1	8	2	4	4	4	4	4	4	3	4	4	4	4	4	4	4	4	4	4	4	4	5	4	5	5	3	5	3	3	3	3	2	2	2	2	2	2	2	2	2	2	2	2	2	2	2	5
1	19	2	12	2	4	5	2	3	5	5	5	3	5	1	1	1	3	4	1	2	2	2	1	3	2	3	3	5	5	4	5	3	3	2	2	5	5	5	3	3	3	2	5	5	3	5	5	5	4
2	20	2	7	2	5	5	4	3	4	4	5	5	5	2	1	3	2	3	1	1	2	4	4	4	2	3	3	5	5	4	3	4	3	3	2	3	3	3	4	3	4	2	3	4	3	4	5	5	5
1	19	2	10	2	1	2	4	3	4	2	3	2	4	2	1	2	1	4	1	2	1	1	3	4	4	5	5	4	4	2	2	1	1	2	2	1	1	2	2	1	2	5	2	2	1	1	4	5	5
1	20	1	1	2	4	4	2	4	5	3	2	5	5	1	1	1	1	2	1	1	1	1	4	5	3	4	5	1	5	4	2	3	3	1	1	1	1	1	1	1	1	2	3	3	1	1	4	5	5
2	19	2	5	2	3	4	4	3	4	3	3	3	3	2	2	1	1	2	2	1	1	2	2	4	3	3	3	4	5	3	3	2	2	3	1	2	1	2	2	1	2	2	3	3	2	3	5	5	5
2	21	1	4	2	4	4	4	5	5	5	3	5	5	4	1	1	1	1	1	3	3	2	5	5	5	5	5	3	5	5	2	4	2	1	2	4	2	4	4	2	4	4	1	1	3	1	5	5	5
2	19	2	1	2	3	5	5	3	4	5	4	5	5	1	1	1	1	1	1	1	1	1	2	5	3	3	5	3	5	3	3	2	1	1	1	1	1	1	1	1	1	1	1	1	1	1	4	4	5
2	20	2	7	2	3	4	3	3	4	3	3	4	5	1	1	1	1	2	1	1	2	1	3	5	3	4	4	5	5	3	2	2	2	1	1	2	2	3	2	2	2	2	2	2	2	1	5	5	4
1	23	2	4	2	3	3	3	2	4	2	3	3	3	3	3	3	2	2	2	3	2	1	4	5	3	4	5	4	5	4	2	1	2	1	1	2	2	1	2	3	3	3	2	2	3	3	3	5	5
1	18	2	8	2	4	3	3	3	4	3	4	5	4	1	1	1	1	1	1	2	1	1	4	4	5	5	5	4	5	3	2	2	2	1	1	1	2	2	1	2	1	2	1	1	1	1	5	5	5
1	19	2	3	2	5	5	5	5	5	5	5	5	5	5	5	5	5	5	5	5	5	5	5	4	5	4	3	4	5	5	5	5	5	5	5	5	2	3	2	2	5	5	3	3	4	2	2	3	5
2	20	2	3	2	4	4	4	4	3	4	4	4	5	1	1	2	3	3	1	2	1	1	3	3	2	3	4	1	5	5	5	5	4	3	2	3	3	2	3	3	3	3	2	2	2	3	3	3	3
1	19	2	5	2	3	4	3	4	4	4	3	3	4	4	1	3	2	3	1	3	3	3	3	3	4	4	4	4	4	2	3	3	3	3	2	3	3	4	4	3	3	3	2	4	4	2	5	5	5
1	21	2	8	2	4	4	3	4	5	4	5	4	2	1	1	2	1	2	1	2	1	1	4	5	3	3	4	4	5	2	2	3	3	2	1	2	2	3	2	1	2	2	1	2	1	1	5	3	4
1	24	2	13	2	4	5	3	4	5	4	3	5	5	1	1	1	1	1	1	1	1	1	4	5	5	5	4	4	5	3	2	1	3	1	1	1	2	2	2	1	1	2	1	2	2	1	4	5	5
2	18	2	8	2	5	5	4	4	5	5	3	5	4	2	1	2	1	1	1	5	1	2	2	5	3	3	1	3	5	5	4	5	3	1	5	3	5	3	2	2	2	1	1	1	1	3	5	5	5
1	22	2	6	2	5	5	5	5	5	5	5	5	4	1	3	1	5	1	1	1	1	1	5	5	4	5	5	5	5	1	1	1	2	1	1	1	1	1	1	1	1	1	2	1	1	1	1	1	1
1	22	2	6	2	5	5	3	3	4	5	3	5	4	1	1	2	2	3	1	3	5	1	5	5	5	4	5	3	5	3	2	2	3	2	1	1	1	2	1	1	1	1	1	1	2	2	2	5	5
1	30	2	15	2	5	5	5	5	5	5	5	5	5	1	1	1	1	1	1	1	1	1	5	5	5	4	4	5	5	4	1	2	3	1	3	1	1	2	1	1	1	1	1	2	2	1	5	5	5
1	26	2	16	2	2	2	3	4	4	4	5	1	4	4	5	1	1	1	2	4	1	1	2	4	5	4	5	5	5	1	2	1	4	1	1	1	2	1	2	1	1	1	1	1	1	1	4	4	4
1	30	1	11	2	1	1	1	1	1	1	1	1	1	1	5	5	5	5	1	5	5	1	1	5	5	3	3	5	5	5	5	5	5	1	1	1	1	5	1	1	1	1	5	1	1	3	5	3	1
2	27	1	12	1	4	4	4	4	4	4	3	4	4	2	2	1	2	2	1	1	2	2	2	4	4	4	5	3	5	4	3	3	3	2	2	3	2	3	2	3	2	3	2	2	2	2	2	2	4
2	24	1	16	1	5	5	4	5	5	5	5	5	4	1	1	1	1	1	1	1	1	1	5	4	3	4	5	3	5	5	4	1	1	5	1	1	1	1	1	1	1	1	1	1	1	1	5	5	5
1	23	1	6	2	3	5	5	4	4	3	5	5	5	3	3	1	1	1	1	1	5	1	2	3	3	4	4	5	5	5	3	1	1	1	1	1	3	1	2	1	1	1	1	1	1	3	5	5	5
1	24	2	12	2	5	5	5	5	5	5	5	5	5	1	1	1	1	1	1	1	1	1	5	5	5	5	5	5	5	2	2	1	2	1	1	1	1	2	1	1	1	1	1	1	1	2	5	5	5
1	18	1	10	1	4	5	5	4	5	3	5	5	4	1	1	2	3	5	1	2	3	3	4	3	4	5	5	4	5	2	2	1	1	1	2	1	1	4	3	2	3	4	2	1	1	1	3	4	4
2	23	2	4	2	5	5	3	4	5	5	4	4	5	1	1	1	1	1	1	1	1	1	5	5	5	5	5	5	5	4	2	2	1	3	1	1	1	1	2	2	1	1	1	2	1	1	5	5	5
2	22	1	1	2	4	4	4	3	5	4	1	4	1	1	1	2	1	3	1	2	3	1	4	4	4	3	3	4	3	2	2	3	3	1	2	2	1	2	2	1	3	2	4	3	3	1	2	4	4
2	23	1	2	2	5	4	4	3	3	1	1	1	1	1	4	3	2	4	1	1	1	1	3	3	3	4	4	3	4	5	4	3	3	3	2	2	3	1	2	2	4	3	1	1	1	1	1	1	2
1	25	2	3	2	3	3	2	2	4	1	1	3	5	2	1	1	2	2	3	2	2	2	4	5	4	4	4	3	4	2	2	2	2	1	1	2	2	2	2	3	2	3	2	2	3	2	4	3	4
1	23	1	4	2	5	4	3	4	4	3	3	4	3	1	1	1	1	1	1	2	1	1	5	5	4	5	4	2	5	2	2	1	1	1	1	1	1	1	2	1	1	1	2	1	1	1	3	4	5
1	21	2	8	2	4	5	3	4	5	4	3	4	5	1	1	1	1	2	1	2	1	3	4	5	5	4	5	4	5	3	3	2	1	2	1	2	1	1	1	2	1	1	3	3	1	2	4	4	5
1	18	2	6	2	5	5	3	4	4	3	5	4	3	1	1	1	1	1	1	3	2	1	4	5	3	3	4	3	4	2	1	2	2	1	1	1	1	3	1	2	1	2	3	1	2	1	5	5	5
1	24	2	6	2	4	4	3	3	3	3	4	4	5	2	3	2	2	3	2	3	3	2	3	3	4	2	2	3	2	4	3	3	3	2	3	4	2	3	3	4	3	4	4	4	2	2	4	4	4
1	18	2	3	2	5	4	3	4	4	3	5	5	5	3	1	1	1	3	1	1	1	1	5	5	3	2	4	4	2	2	1	2	5	2	2	2	2	3	3	3	3	2	2	2	2	2	5	5	5
1	18	2	9	2	5	5	3	5	5	5	5	5	4	1	4	4	1	1	1	3	1	1	3	5	5	2	4	4	5	3	5	1	2	1	3	4	2	4	2	1	1	1	2	1	1	1	5	5	5
1	18	2	6	2	5	5	4	5	4	5	4	5	5	1	3	1	1	1	2	3	1	1	5	5	5	5	5	5	5	4	3	2	1	1	1	1	1	1	2	1	3	1	2	1	1	1	3	5	5
1	18	2	9	2	3	5	2	4	5	4	5	5	5	1	1	1	1	1	1	1	1	1	2	3	3	2	4	2	5	2	3	3	2	1	2	2	1	2	2	1	2	1	2	1	1	2	5	5	5
1	18	2	7	2	5	5	5	5	5	5	5	5	5	1	1	1	1	1	1	1	1	1	5	5	5	5	5	5	5	2	2	2	1	1	2	1	1	1	1	1	1	1	2	2	1	1	5	5	5
1	18	2	6	2	4	5	4	3	4	4	3	4	5	1	1	1	1	1	1	1	1	1	5	4	5	5	4	4	5	2	2	2	2	1	2	2	2	2	1	2	2	1	2	1	1	1	5	5	5
1	18	2	9	2	4	4	5	5	5	5	5	5	4	5	5	5	5	4	5	4	5	5	3	3	4	4	4	4	4	1	2	2	5	3	3	4	4	4	4	4	5	4	3	3	4	3	5	4	3
1	18	1	3	2	5	5	5	3	5	4	4	4	5	2	1	1	1	1	1	1	1	1	1	2	5	5	5	1	5	2	1	3	1	1	1	1	1	2	1	1	1	1	1	1	1	3	5	5	5
1	18	1	2	2	4	4	4	4	5	3	3	4	5	2	1	1	4	2	1	4	3	2	4	5	4	5	4	4	4	4	2	2	2	3	1	1	1	2	2	1	2	2	1	2	1	2	5	4	5
2	18	2	2	2	4	3	2	5	4	5	3	4	4	3	1	2	2	1	1	1	1	2	5	5	4	3	3	5	5	2	4	4	1	1	5	3	1	2	3	3	3	1	3	3	2	1	5	5	5
1	18	1	1	2	4	4	3	4	5	4	2	3	5	3	4	3	1	1	3	1	3	3	4	4	5	5	4	3	5	2	1	1	1	1	1	1	4	1	2	3	2	3	2	2	3	2	3	5	4
1	18	1	2	2	2	4	5	3	5	5	2	3	4	3	1	2	3	4	2	3	2	2	5	4	5	5	3	3	4	4	2	5	5	2	2	2	4	3	3	2	2	3	3	4	3	2	1	2	4
1	24	2	2	2	5	5	5	5	5	5	5	5	5	5	5	1	4	1	3	3	1	1	5	5	5	5	5	5	5	2	2	2	2	1	1	1	1	1	1	1	1	1	1	1	1	1	1	1	1
1	20	2	10	2	5	5	3	5	5	4	4	5	5	1	1	1	1	2	1	1	1	1	4	5	5	5	5	5	4	4	4	3	3	1	2	1	2	1	1	1	2	1	1	1	1	1	5	5	5
1	23	2	10	2	4	4	3	3	4	4	2	4	4	2	2	3	2	1	2	3	1	1	5	4	3	3	3	4	5	2	3	3	2	2	2	2	2	2	2	2	2	2	1	2	2	2	3	3	4
1	19	2	9	2	5	5	3	5	4	4	5	4	5	2	1	1	1	2	1	3	1	1	4	4	4	4	5	5	5	2	3	1	3	1	1	1	2	3	1	2	1	2	1	1	1	1	4	4	5
1	35	1	15	2	5	5	3	5	4	3	3	5	3	2	1	1	1	1	1	1	1	1	5	4	5	5	5	5	5	4	3	1	3	1	1	1	1	2	1	1	1	1	2	1	1	1	4	2	1
1	35	1	3	2	2	5	5	5	5	4	2	4	4	2	3	1	1	1	2	1	2	2	4	4	4	5	5	2	5	4	3	2	2	4	2	2	2	3	2	2	2	2	2	2	3	5	5	4	4
2	27	1	19	1	4	3	4	4	4	4	2	4	4	1	1	1	1	2	1	1	1	1	3	4	3	4	4	3	4	4	2	1	3	2	1	2	1	2	4	3	3	2	2	2	2	1	3	4	4
2	18	2	7	2	4	4	2	5	5	4	3	4	5	1	1	1	1	1	1	1	1	1	5	4	4	4	5	4	5	4	3	3	4	2	3	2	1	4	2	2	2	2	3	3	2	2	5	5	5
1	27	2	15	2	5	5	5	5	5	5	5	5	5	1	1	1	1	1	1	1	1	1	5	5	5	5	5	5	5	2	1	1	2	1	2	1	1	1	1	1	1	1	1	1	1	1	5	5	5
1	19	2	7	2	3	5	5	3	4	5	3	2	5	1	1	1	1	3	1	1	1	4	5	5	3	2	3	4	5	3	4	4	5	1	3	4	3	3	2	4	3	1	4	4	5	4	5	5	5
2	19	1	5	2	3	3	4	4	3	2	4	4	3	3	1	2	1	3	1	3	2	2	3	5	2	4	3	5	5	3	4	5	3	2	1	3	1	4	4	2	2	3	3	3	2	1	4	4	5
2	22	1	4	1	4	4	4	5	5	5	4	4	1	1	1	1	1	1	1	1	1	1	4	4	4	4	4	4	4	3	3	2	3	2	3	1	1	1	1	1	2	1	1	2	2	1	4	4	5
2	20	2	2	2	1	2	1	1	1	1	1	1	1	5	4	5	5	5	5	5	5	5	1	3	5	4	4	4	5	5	5	2	2	5	5	3	3	5	5	5	5	2	5	5	5	5	5	5	5
1	24	2	13	2	1	5	3	4	5	4	5	5	5	1	1	1	1	2	1	1	1	1	2	4	4	4	3	4	5	4	4	1	3	2	3	1	1	3	2	1	1	1	2	1	1	2	5	5	5
2	22	2	6	2	3	4	4	4	4	3	2	3	1	1	1	1	1	2	1	1	1	1	2	3	3	4	4	4	5	2	1	3	3	1	1	2	1	3	1	1	1	1	1	1	1	1	4	4	5
1	22	2	10	2	5	5	5	5	5	5	5	5	5	1	1	1	1	1	1	1	1	1	5	5	5	5	5	3	5	2	3	3	3	1	1	2	1	1	1	1	1	1	1	1	1	1	5	5	5
2	18	2	7	2	5	5	4	5	4	5	3	4	5	1	1	1	1	1	1	1	1	2	5	5	5	5	4	4	3	3	2	1	3	1	1	1	2	1	2	1	1	1	1	1	1	2	3	3	5
2	21	2	7	2	4	5	2	3	4	4	2	4	4	2	1	2	1	2	1	1	2	2	3	3	1	3	2	2	5	2	2	2	1	2	2	2	2	2	3	3	3	3	3	3	2	2	4	4	4
1	35	2	22	2	5	5	5	5	5	5	3	4	5	2	1	1	1	1	1	1	1	1	5	5	3	4	5	3	5	2	1	3	1	1	1	1	2	3	2	2	1	1	2	2	1	1	5	5	5
1	23	2	1	2	5	5	4	4	4	5	4	5	5	1	1	1	1	1	1	1	1	1	5	5	5	4	5	5	4	3	3	2	1	1	1	2	2	3	2	1	2	1	1	1	2	2	5	5	5
2	27	2	15	2	5	5	5	5	5	5	5	5	5	5	5	5	5	1	5	5	5	5	5	5	5	5	5	5	5	5	1	5	1	5	5	5	5	5	5	5	5	5	5	5	5	5	5	5	5
2	18	2	3	2	4	4	3	4	4	3	4	4	5	1	1	1	1	1	1	2	1	1	4	4	3	4	4	3	4	3	3	2	2	1	2	2	1	2	2	1	2	2	2	1	2	1	4	4	4
2	18	2	1	2	4	5	2	5	5	5	3	2	1	1	1	1	1	1	1	1	1	1	5	4	4	4	4	4	5	3	2	2	2	2	2	1	1	1	1	1	1	1	1	2	1	2	1	2	5
2	18	2	3	2	5	5	3	3	5	3	3	5	4	3	2	3	3	2	2	1	2	3	5	5	5	4	5	4	5	3	4	2	3	1	1	2	2	4	1	3	1	1	1	3	2	4	5	5	5
1	23	2	12	2	4	5	5	5	5	5	5	5	5	5	5	5	5	5	5	5	5	5	5	5	5	5	5	5	5	5	5	5	5	5	5	5	5	5	5	5	5	5	5	5	5	5	5	5	5
2	35	2	1	1	3	5	5	3	4	3	3	4	5	1	1	1	1	1	1	1	1	1	5	4	4	5	5	5	4	1	1	1	1	1	1	1	2	1	1	1	1	1	1	1	1	1	1	5	5
1	24	2	10	2	2	4	4	5	5	4	4	3	4	1	1	1	1	3	1	1	1	1	3	3	5	4	5	4	5	2	1	1	3	1	1	1	1	1	1	1	1	1	1	1	1	1	4	5	5
2	18	2	4	2	4	4	3	3	3	4	4	4	5	1	1	1	3	3	3	1	3	2	5	3	2	3	4	2	5	5	4	4	3	5	2	3	3	3	2	2	1	2	1	1	1	1	1	1	1
2	22	2	8	2	3	4	3	3	4	3	3	4	4	2	1	2	1	2	3	2	3	3	3	4	3	3	4	4	4	4	3	2	4	1	1	3	3	3	4	3	3	4	4	2	2	2	4	4	3
1	29	2	15	2	3	5	5	3	5	1	5	5	5	1	2	1	1	2	3	2	1	2	5	5	4	3	5	5	5	4	3	5	5	3	1	2	5	2	3	5	5	5	2	4	2	1	5	3	3
1	24	2	14	2	5	3	3	2	5	4	4	5	5	4	3	4	5	3	4	2	5	1	4	4	5	5	5	5	5	1	3	1	4	2	2	2	2	2	1	2	3	1	3	1	3	1	3	1	3
1	22	2	10	2	3	3	4	2	4	2	3	3	5	1	1	1	1	2	1	1	1	2	3	4	4	3	3	4	3	3	2	2	2	2	3	2	3	3	3	3	3	2	2	3	3	3	5	5	5
2	18	2	4	2	4	4	4	4	5	3	3	3	3	2	4	3	3	4	3	4	4	3	4	4	2	2	3	5	5	3	1	4	2	5	1	3	2	3	4	3	2	1	4	3	2	4	5	5	3
2	18	2	4	2	4	4	3	2	3	4	1	2	3	3	1	2	3	3	2	1	2	5	3	3	5	2	2	4	5	3	3	3	2	3	2	2	3	1	3	3	3	2	2	1	3	1	2	4	3
2	18	2	4	2	4	4	3	2	3	4	1	2	3	3	1	2	3	3	2	1	2	5	3	3	5	2	2	4	5	2	1	3	3	4	2	3	3	2	4	3	2	4	5	1	2	3	4	1	2
2	18	2	4	2	4	3	3	3	2	2	4	4	4	2	2	1	1	1	1	2	2	1	4	3	4	3	4	4	4	3	3	3	3	1	1	2	3	3	3	3	2	2	2	2	2	2	3	4	4
2	18	2	5	2	5	5	5	5	4	5	5	3	5	5	5	5	5	5	3	5	5	5	2	4	2	1	3	2	5	5	2	5	5	1	5	1	1	5	5	5	3	5	2	4	5	5	5	5	5
2	18	2	1	2	5	5	4	5	5	3	2	4	4	2	2	1	1	1	1	1	2	1	4	5	3	3	5	5	5	2	3	1	1	2	3	1	1	2	2	2	3	3	4	1	2	4	4	5	5
2	18	2	3	2	5	5	4	5	5	5	5	5	5	1	1	1	1	1	1	1	1	1	5	5	5	4	3	4	5	3	2	3	3	2	1	1	1	1	1	1	1	1	1	1	1	1	5	5	5
2	18	2	2	2	5	5	5	5	5	3	5	5	5	1	1	1	1	2	1	3	1	3	4	4	3	3	3	4	5	2	4	2	2	5	5	1	2	3	3	3	1	1	3	3	5	2	3	2	2
1	23	2	9	2	5	5	5	5	5	5	5	5	5	1	1	1	1	1	1	1	1	1	5	5	5	5	5	5	5	1	2	1	1	1	1	1	1	1	1	1	1	1	1	1	1	1	5	5	5
2	21	1	9	1	5	5	2	5	5	5	4	5	5	1	1	1	1	1	1	1	1	1	3	4	3	3	3	4	5	5	2	3	2	4	1	1	1	3	3	2	2	2	1	4	3	1	5	5	5
2	21	1	7	2	4	5	3	3	5	4	2	5	5	2	1	1	1	1	1	1	1	1	4	4	4	3	4	3	4	3	3	3	3	2	1	2	2	3	1	2	2	3	1	1	1	2	3	5	5
1	22	2	8	2	2	2	2	2	4	3	2	2	2	1	1	1	1	1	1	4	3	2	4	4	4	4	2	2	4	2	3	3	2	4	2	3	2	4	2	3	2	3	2	2	3	3	5	5	5
1	23	1	9	1	4	5	4	5	5	5	5	5	5	1	1	1	1	2	1	1	1	2	5	5	5	5	4	3	5	3	3	2	1	2	1	1	2	1	2	1	2	2	1	1	1	1	5	5	5
1	22	1	12	2	3	4	4	4	5	5	5	5	5	5	5	5	1	1	1	1	1	1	5	5	5	5	5	4	5	1	1	1	1	1	1	2	1	1	2	2	2	1	1	1	5	5	5	5	5
1	21	2	2	2	4	5	3	2	3	2	3	4	5	2	1	2	1	1	1	1	1	1	4	4	4	4	4	2	5	3	3	2	2	1	1	1	2	2	3	2	3	2	2	2	2	1	4	4	4
1	23	1	10	2	5	5	5	5	5	5	5	5	5	1	1	1	1	1	1	1	1	1	4	5	5	5	5	2	5	2	2	1	2	1	1	1	1	1	2	1	2	2	2	2	1	3	5	5	5
1	25	2	8	2	4	4	5	3	5	4	4	3	4	1	1	1	1	1	1	1	1	1	2	4	4	4	2	4	4	4	2	1	5	1	1	1	2	3	3	2	2	1	2	2	2	1	5	5	5
2	21	1	5	2	5	5	4	3	4	4	3	3	4	2	1	1	1	1	1	2	1	1	3	4	5	5	5	3	5	4	2	2	2	4	2	2	3	3	3	3	3	3	3	3	3	3	3	3	3
2	24	1	13	2	5	4	4	3	5	5	2	4	5	2	1	1	1	1	1	2	1	1	5	5	5	5	4	3	5	3	2	2	2	3	2	2	2	2	2	2	2	2	2	2	2	2	4	5	5
1	22	1	7	2	3	3	2	3	4	3	1	1	2	3	1	2	4	4	1	4	2	2	5	5	4	3	3	3	4	2	2	3	4	2	1	1	1	2	2	2	3	3	3	3	3	3	3	3	3
1	24	1	2	2	4	5	5	4	4	4	4	4	5	1	1	1	1	1	1	4	1	1	4	4	5	4	5	5	5	3	2	3	2	1	1	2	2	1	1	1	1	2	1	2	1	1	3	4	4
1	22	2	10	2	4	5	4	3	4	3	1	1	5	1	1	1	1	1	1	1	1	1	5	5	5	5	5	5	5	2	1	2	1	1	1	2	1	2	2	1	1	1	2	2	1	2	5	5	5
2	21	1	5	2	2	5	3	33	5	5	5	3	5	1	1	1	1	1	1	1	1	1	5	3	5	5	5	3	5	3	1	3	4	2	4	3	2	3	3	3	3	3	3	3	3	3	3	3	4
1	21	1	6	2	3	4	4	5	4	2	3	5	5	1	1	1	1	2	1	2	1	1	5	5	3	3	2	4	4	3	3	3	4	4	3	2	4	2	3	4	4	3	3	2	3	4	5	5	5
1	21	2	1	2	3	2	1	2	3	1	1	3	2	3	2	3	3	3	2	3	1	3	2	3	1	1	1	2	3	3	3	3	2	2	2	3	3	4	3	3	4	3	4	3	4	3	3	3	3
2	23	1	4	2	3	4	3	3	5	3	2	4	5	1	1	1	1	1	1	1	1	1	4	4	4	4	4	4	5	2	2	2	1	1	1	1	1	1	2	1	2	1	1	1	1	1	4	4	4
2	21	1	1	2	4	4	3	4	4	3	3	4	4	2	1	1	1	2	1	1	1	2	4	3	4	4	4	3	5	3	2	2	2	3	1	1	2	1	2	1	2	1	1	2	2	1	4	4	5
1	22	1	7	2	4	5	3	4	4	4	3	4	3	2	1	1	1	1	1	1	1	1	3	4	3	3	4	3	3	3	3	2	3	2	2	3	3	2	3	3	3	2	4	4	3	4	4	4	5
2	22	1	2	2	4	4	3	4	4	4	2	3	4	3	1	2	2	2	1	1	1	2	4	3	3	3	4	3	4	4	3	3	4	3	2	4	2	2	4	4	4	3	4	4	4	3	4	4	4
2	21	2	4	2	4	4	3	3	4	4	3	4	4	2	1	2	2	2	1	3	2	2	4	4	3	4	4	3	4	4	3	3	3	3	2	2	2	2	3	2	2	2	4	4	3	3	4	5	5
2	21	1	10	2	5	5	2	4	5	4	5	5	5	1	1	1	1	3	1	1	1	3	5	5	4	5	4	4	5	4	3	2	1	1	1	1	1	1	2	1	1	1	1	1	2	2	5	5	5
1	22	1	8	2	5	4	2	5	5	5	1	2	4	1	1	1	1	1	1	1	1	1	5	5	5	5	5	1	5	4	1	1	2	1	1	2	1	5	1	3	2	2	2	4	5	2	5	5	5
1	25	2	14	2	3	5	5	5	5	5	4	4	5	1	1	1	1	3	2	1	1	1	1	5	3	4	2	3	5	2	3	2	3	3	2	4	2	3	4	4	1	2	5	1	4	4	3	2	3
1	23	1	11	2	2	2	3	1	4	2	1	2	3	2	2	2	1	1	1	1	3	1	3	4	4	3	3	3	4	2	1	1	1	1	1	1	1	1	2	2	2	2	4	2	5	1	2	4	4
1	22	2	4	2	3	5	4	3	5	1	4	4	5	1	1	1	1	1	2	2	2	1	4	5	5	4	3	3	5	4	2	3	2	1	1	2	1	3	4	1	3	2	2	2	3	3	4	4	5
2	21	2	3	2	5	5	5	5	5	5	5	5	5	1	1	1	1	1	1	1	1	1	5	5	5	5	4	2	5	3	2	1	1	2	1	1	1	1	2	1	2	1	1	1	2	1	5	5	5
1	22	1	5	2	3	5	3	4	5	4	3	3	4	2	1	1	1	1	1	1	2	1	4	5	5	5	5	5	5	3	2	2	3	1	1	1	1	1	1	1	1	2	2	1	1	2	5	5	5
1	22	1	2	2	1	4	3	2	4	5	5	5	5	1	1	1	1	3	1	1	1	2	3	5	5	4	3	4	5	3	1	2	1	1	1	2	2	1	1	2	1	1	1	2	1	2	5	5	5
1	21	1	3	2	5	5	5	5	5	5	5	5	5	1	1	1	1	1	1	1	1	1	5	5	5	5	5	5	5	3	1	1	1	1	1	1	1	2	1	1	1	1	1	1	1	1	5	5	5
1	21	2	4	2	3	4	4	3	5	2	4	2	2	3	1	1	1	1	1	1	2	1	3	4	2	3	4	3	4	2	3	2	1	1	4	1	1	3	2	1	1	1	2	1	2	1	4	4	5
1	22	1	11	2	3	4	4	4	4	4	2	3	3	2	1	1	1	3	1	3	1	1	4	5	4	4	4	4	5	3	2	3	1	1	1	1	2	2	2	2	3	3	2	2	2	3	4	4	4
1	21	2	8	2	4	4	4	4	5	4	4	4	4	3	1	2	1	2	1	1	2	1	5	4	4	4	4	4	5	4	2	2	1	1	1	2	3	2	2	2	2	2	3	2	2	2	5	5	5
2	22	1	2	2	4	5	4	4	5	5	4	4	5	1	1	1	1	2	1	1	1	1	5	5	4	5	5	3	4	4	4	3	3	2	3	4	2	3	3	2	3	3	2	2	2	3	4	4	4
1	22	1	3	2	5	5	5	5	5	5	5	4	5	1	1	1	1	1	1	1	1	1	5	5	5	5	5	5	5	3	1	1	1	1	1	1	1	1	1	1	1	1	1	1	1	2	4	4	4
1	35	2	20	1	5	5	5	5	5	5	5	5	5	1	1	1	1	1	1	1	1	1	5	5	5	3	3	5	5	2	1	2	5	1	1	1	1	3	2	1	1	1	1	1	1	1	3	3	3
1	23	2	8	2	2	5	3	3	5	3	3	2	4	1	4	5	1	3	1	1	1	1	3	3	2	1	3	2	5	1	5	4	5	1	1	1	1	4	1	1	1	1	1	1	1	1	5	4	4
2	20	1	7	2	5	5	5	5	5	5	2	4	5	1	1	1	1	5	1	2	2	2	5	5	5	5	1	5	5	5	5	5	5	1	2	2	1	5	2	2	2	2	2	2	2	2	2	2	2
2	19	1	1	2	3	3	2	2	2	2	2	3	3	3	3	3	3	3	3	3	3	3	3	3	3	3	3	3	3	4	3	3	3	1	1	1	1	1	1	1	1	1	1	1	1	1	1	1	1
2	19	1	5	2	3	3	3	3	4	3	2	3	3	3	3	3	3	3	3	3	3	3	3	3	3	3	3	3	3	3	3	3	3	3	3	3	3	3	3	3	3	3	3	3	3	3	3	3	3
1	22	2	9	1	5	5	5	5	5	5	3	5	5	1	1	1	1	1	1	1	1	1	5	5	5	5	5	5	5	3	1	1	1	1	1	1	1	1	1	1	1	1	1	1	1	1	1	1	5
1	22	2	8	2	3	5	3	1	5	2	2	4	4	1	1	1	1	1	1	1	1	1	4	5	5	5	5	3	5	3	2	1	1	1	1	1	1	1	1	1	1	1	1	1	1	1	5	5	5
1	20	2	7	2	2	4	2	2	2	3	2	1	5	1	1	1	1	1	1	1	1	1	3	4	3	3	3	4	4	3	2	2	1	1	1	1	2	3	2	1	2	2	3	3	2	2	4	5	5
1	20	1	8	2	2	1	4	4	5	3	5	4	5	1	1	1	1	1	1	1	1	1	5	5	4	4	4	2	4	2	3	2	2	1	1	2	1	2	1	1	1	2	1	2	2	3	5	5	5
2	19	1	2	2	4	3	4	4	5	3	3	2	4	1	1	3	1	1	1	1	1	1	3	3	3	3	3	3	4	5	3	3	3	1	2	2	3	3	3	3	3	3	2	3	4	1	5	5	5
1	22	2	4	2	2	4	3	1	1	1	1	4	5	1	1	1	1	2	1	1	3	1	3	5	4	4	4	3	5	5	3	4	2	1	1	4	1	1	2	2	2	2	1	2	1	2	5	5	3
1	21	2	11	2	1	1	1	1	1	1	1	1	1	1	1	1	1	2	5	1	1	5	1	2	1	1	1	1	5	1	5	1	1	1	1	1	5	1	5	1	5	5	1	1	1	1	1	1	1
1	21	1	13	2	4	5	5	4	5	4	2	2	4	2	1	2	1	1	1	1	2	3	4	4	4	4	4	4	4	5	2	2	1	2	1	2	2	2	2	2	2	3	2	2	2	2	4	4	4
2	19	1	8	2	2	2	3	1	1	2	1	2	4	2	1	1	1	1	1	1	1	1	4	4	2	3	3	3	4	2	3	1	1	1	1	2	2	1	3	3	3	2	2	2	2	2	4	4	4
1	20	2	7	1	5	5	5	5	5	4	5	5	5	1	1	1	1	1	1	1	1	1	5	5	5	5	5	5	3	3	3	2	1	1	1	1	1	1	1	1	1	1	1	1	2	1	5	5	5
2	19	1	6	2	5	5	4	4	4	4	5	3	4	2	2	1	2	3	1	1	1	2	5	4	3	3	3	4	4	3	3	5	2	1	1	4	3	2	3	3	3	2	2	2	1	1	4	4	4
2	20	2	10	2	5	5	4	4	4	5	4	5	5	2	2	2	2	2	3	1	2	2	4	5	4	4	3	3	5	4	3	3	4	2	1	2	2	3	4	2	3	3	4	3	3	3	5	4	5
2	20	1	11	1	5	5	4	5	5	5	5	5	5	3	5	4	3	3	4	3	1	3	3	4	4	3	3	3	5	3	4	3	4	3	3	3	3	3	4	3	3	3	3	2	4	2	5	5	5
1	20	2	9	2	2	4	2	3	5	1	2	3	2	1	1	1	1	1	1	2	1	1	3	3	3	4	3	2	4	2	2	2	2	1	1	4	2	2	2	1	2	2	2	1	1	1	2	2	1
1	19	2	8	2	3	4	4	3	4	3	2	3	5	2	1	2	2	2	1	1	1	2	4	4	3	3	4	3	5	3	2	2	2	1	2	1	2	3	2	3	3	2	3	3	3	2	4	3	3
2	20	1	8	1	4	3	4	3	4	3	2	3	4	3	2	2	2	3	1	2	2	2	3	4	3	3	3	3	3	4	3	2	1	2	2	2	2	2	3	3	3	3	3	3	3	2	4	4	4
1	20	1	10	2	4	5	4	4	5	4	3	4	5	2	2	3	2	3	1	4	1	3	4	4	4	4	4	4	5	5	3	1	4	2	1	1	3	1	3	2	3	2	2	2	1	2	4	4	5
1	20	1	9	2	3	3	4	43	4	4	3	3	4	3	2	2	3	3	2	2	2	4	3	4	3	3	3	4	4	3	3	3	2	2	2	2	2	3	2	2	2	2	2	2	2	1	3	3	3
1	22	1	10	2	5	5	5	5	5	5	5	5	5	5	5	5	5	5	5	5	5	5	5	5	5	5	5	5	5	3	3	3	4	2	3	2	2	3	3	2	2	3	3	3	3	3	5	4	3
2	25	1	15	2	3	4	3	3	4	4	3	3	3	2	2	2	3	3	3	2	2	3	4	3	3	3	2	2	5	5	4	4	3	4	3	3	3	4	4	4	4	4	4	4	4	4	4	3	3
1	20	1	9	2	5	5	5	5	5	5	5	5	5	1	1	1	1	1	1	1	1	1	5	5	5	5	5	5	5	1	1	1	1	1	1	1	1	1	1	1	1	1	1	1	1	1	5	5	5
2	20	2	8	2	5	5	4	5	5	5	5	5	5	2	1	1	2	2	1	2	1	1	3	3	3	3	3	2	4	4	3	3	3	3	3	2	2	3	3	3	3	3	3	3	3	3	3	3	3
1	20	2	4	2	4	4	5	4	4	3	4	5	4	1	1	4	4	2	2	2	1	1	4	4	4	5	4	3	5	3	3	3	2	1	1	1	1	2	2	1	2	1	2	2	2	1	4	2	4
2	21	2	7	2	5	5	4	5	5	5	4	5	5	1	1	1	1	2	1	3	1	1	5	5	5	5	5	5	5	3	2	1	2	2	1	1	1	1	1	2	1	1	1	2	1	2	5	5	5
2	22	2	4	2	5	5	5	5	5	5	5	5	5	5	5	3	1	3	3	3	3	3	5	5	5	5	5	3	5	5	3	3	3	1	3	3	3	3	3	3	3	3	3	3	3	3	3	3	3
2	20	2	9	2	4	3	3	4	4	4	2	3	4	4	4	2	2	4	2	4	2	2	5	5	5	5	5	5	5	2	3	2	2	1	1	1	1	1	2	4	2	2	1	1	2	2	2	4	4
2	25	1	6	2	5	5	3	5	5	5	2	5	5	1	1	1	1	1	1	1	1	1	5	5	5	3	3	1	5	3	2	2	1	1	1	2	1	1	2	1	2	2	2	2	2	2	4	5	5
2	21	1	10	2	5	5	3	5	5	5	3	3	5	2	3	3	2	2	1	1	1	2	5	5	4	4	4	3	4	4	4	5	3	3	4	2	2	5	3	2	2	4	3	3	3	3	3	3	3
2	20	2	13	2	3	3	3	4	4	3	3	5	5	1	1	2	2	1	1	1	1	1	2	3	1	3	2	2	5	2	3	3	3	1	2	3	2	3	3	2	2	2	1	1	1	1	5	5	5
1	22	2	11	2	4	4	3	3	4	3	3	3	3	3	1	1	1	1	1	1	1	1	4	4	4	4	4	3	5	3	2	2	3	1	2	3	2	2	2	2	3	2	1	2	2	2	2	2	5
2	21	2	5	2	3	3	2	4	4	3	3	3	3	3	3	3	3	2	2	3	3	3	2	3	3	4	4	2	5	4	2	2	1	3	2	2	3	3	3	3	3	2	1	1	3	3	3	3	4
2	21	2	8	2	2	2	3	2	2	3	3	5	4	3	2	3	2	3	1	2	2	1	2	2	2	2	4	3	5	3	3	1	1	2	1	2	1	3	2	3	3	3	1	1	2	1	5	5	5
1	21	2	5	2	5	5	3	5	4	5	1	1	1	1	1	1	1	1	1	1	1	1	5	5	5	4	5	3	5	3	2	2	1	1	2	1	3	2	2	2	1	1	1	2	5	5	5	5	5
2	22	1	9	2	4	4	4	4	3	5	5	5	3	5	5	1	1	1	1	1	1	1	3	5	5	4	5	1	5	4	2	1	1	1	1	1	1	1	1	1	1	1	1	1	1	1	1	1	5
2	21	2	2	2	5	5	4	5	5	5	5	5	5	2	5	1	1	1	1	1	1	1	5	5	5	5	5	5	5	3	2	2	2	3	2	2	1	1	1	1	1	1	1	1	1	1	1	1	1
2	21	2	4	2	3	5	4	4	4	5	4	4	4	2	2	2	1	1	1	1	1	1	5	5	5	4	4	4	4	3	3	2	2	2	1	1	1	1	1	1	1	1	3	2	1	3	5	5	5
2	21	1	1	2	4	4	4	4	4	5	4	4	4	5	1	1	1	1	1	1	1	1	4	4	5	5	5	5	5	4	2	2	2	2	2	2	2	1	1	1	1	1	1	1	1	1	4	5	5
1	22	1	6	2	5	5	4	4	4	3	2	5	4	1	1	1	1	1	1	1	1	1	3	5	5	5	5	3	5	2	2	2	2	2	1	1	1	1	1	1	1	1	1	1	1	1	1	5	5
2	23	1	13	2	4	5	4	4	5	5	5	4	4	2	1	1	1	2	1	2	2	2	3	4	4	3	3	3	4	5	3	2	1	2	3	3	2	2	2	2	3	2	2	2	2	2	5	5	5
1	23	2	8	2	5	5	5	5	5	5	5	5	5	1	1	1	1	1	1	1	1	1	5	5	5	5	5	5	5	3	1	1	5	1	1	1	1	1	1	1	1	1	1	1	1	1	1	5	5
1	21	1	8	2	4	4	3	3	5	3	4	4	4	3	1	1	1	1	1	1	1	1	3	3	4	3	3	3	5	3	2	2	1	1	1	1	1	4	1	1	1	2	1	1	1	3	4	3	4
1	21	1	7	2	5	5	5	3	5	3	2	5	5	3	1	3	1	4	1	2	3	2	5	5	5	3	3	3	5	5	4	3	2	3	1	1	2	2	4	4	3	3	3	3	4	5	5	2	2
1	22	2	10	2	4	4	3	3	4	4	3	5	4	2	1	1	1	1	1	1	1	1	4	4	4	3	4	4	4	4	3	3	3	2	2	1	1	2	2	2	2	1	3	3	1	2	4	4	4
1	24	1	8	2	5	5	5	5	5	5	4	5	5	1	1	1	1	2	1	1	1	1	5	5	4	4	5	3	5	3	3	3	2	1	2	3	3	1	2	2	1	2	2	2	3	2	5	5	5
2	21	1	5	2	3	3	4	4	3	4	3	3	5	3	2	2	4	5	1	5	2	3	3	3	4	3	4	4	5	5	5	4	2	4	1	3	3	1	4	4	5	3	3	3	3	4	5	5	5
1	21	1	11	2	5	5	3	5	5	5	3	5	5	2	1	1	1	1	1	4	1	1	4	5	3	4	4	4	4	4	2	2	1	1	1	2	1	2	1	2	2	2	1	1	1	1	4	5	4
2	22	1	13	2	3	3	3	2	2	2	4	2	3	4	3	3	3	2	3	3	3	3	2	3	3	3	3	4	4	4	3	3	4	1	2	3	3	3	3	3	3	3	3	3	3	3	3	3	3
2	21	2	7	2	3	3	2	2	4	3	4	5	5	4	2	2	1	1	1	1	1	1	5	5	4	3	3	5	5	3	4	4	1	5	2	2	1	5	2	2	2	2	1	1	1	3	5	5	5
1	23	2	8	2	1	2	4	1	1	3	3	1	3	2	5	1	1	1	1	3	3	3	2	5	3	4	4	4	4	4	4	3	2	5	1	2	3	3	3	3	2	2	2	1	3	3	5	5	5
2	21	1	6	2	1	1	1	1	1	1	1	1	1	1	1	1	1	1	1	1	5	2	1	1	2	1	2	1	3	4	2	2	3	2	1	3	2	3	3	4	3	2	4	4	3	5	5	5	5
1	21	2	15	2	4	5	4	5	5	5	3	5	4	1	1	1	1	2	1	1	1	1	4	5	5	5	4	3	5	5	2	2	3	2	1	1	1	2	1	1	1	1	1	1	1	1	5	5	5
1	21	1	12	2	3	5	4	4	5	3	4	3	4	2	1	2	1	3	3	5	2	3	3	3	5	3	2	3	5	3	2	2	3	2	2	1	2	2	2	1	2	3	1	2	1	2	5	4	4
2	19	1	4	2	4	4	4	4	4	4	4	5	3	1	1	1	1	2	1	1	1	1	4	3	4	4	3	4	3	3	2	2	1	1	1	1	1	1	1	1	2	2	1	1	1	1	5	5	5
2	19	1	6	2	3	4	3	4	4	4	4	4	4	4	1	1	2	2	1	1	1	2	4	3	3	3	3	4	3	3	3	4	2	1	1	3	3	2	3	3	3	2	2	3	2	2	5	5	5
2	21	1	11	1	3	4	4	4	3	4	5	4	4	3	5	3	2	2	3	4	4	5	4	4	4	4	4	4	4	4	4	5	5	3	4	4	3	5	5	4	5	4	4	5	4	4	5	4	4
1	20	2	7	1	3	3	4	3	4	2	1	4	4	1	1	1	1	2	1	2	1	2	4	5	3	4	3	2	5	3	4	2	4	3	2	2	3	2	4	4	2	3	2	3	3	3	3	5	3
2	20	1	2	1	3	4	3	4	4	4	1	3	5	2	1	1	1	3	1	2	1	1	4	4	4	5	4	3	5	4	3	3	2	3	2	3	3	3	4	3	3	3	3	3	2	3	3	2	3
2	19	2	4	1	3	4	4	5	5	4	1	5	5	1	1	1	2	1	3	3	5	2	3	4	5	2	2	3	4	5	5	1	1	5	2	3	5	2	1	3	2	5	5	3	5	3	3	2	5
2	19	2	5	1	3	3	3	3	3	3	2	3	1	2	3	3	2	3	2	1	3	2	3	3	3	3	3	3	4	4	4	3	2	1	4	2	1	2	3	3	3	2	3	1	3	4	3	3	5
2	21	1	5	1	4	4	4	3	4	4	3	4	4	2	2	3	2	4	3	4	3	3	3	3	3	3	2	4	4	5	4	4	3	5	3	2	3	3	3	3	3	3	4	3	3	3	3	3	3
1	22	2	12	1	3	5	5	5	4	4	5	4	5	2	1	1	1	2	1	1	1	2	3	5	3	5	5	4	5	3	5	1	1	1	1	3	1	3	2	1	2	1	1	1	1	1	5	5	5
1	20	2	6	1	4	5	4	5	5	4	4	5	5	1	1	1	1	3	1	1	1	1	1	3	2	5	1	3	5	4	1	3	1	1	1	1	2	2	3	2	2	1	1	1	1	1	1	1	5
1	19	2	6	1	3	3	3	2	5	3	3	2	5	1	1	1	1	1	1	2	2	2	3	5	5	3	3	5	5	3	3	2	3	3	3	2	2	1	2	3	3	3	4	1	1	2	5	5	5
2	19	1	1	1	4	4	4	4	4	4	4	4	4	1	1	1	1	1	1	4	1	1	4	4	4	4	4	3	4	3	3	3	2	3	1	1	1	1	1	1	1	1	1	1	1	2	4	4	4
1	19	1	5	1	5	5	5	5	5	5	3	5	5	1	1	1	1	1	1	1	1	5	1	4	5	3	2	4	5	5	3	2	5	1	1	1	4	5	2	3	5	3	1	1	5	1	5	5	5
1	19	1	13	1	5	5	5	5	5	5	5	5	5	5	5	3	3	3	3	4	3	3	1	5	5	5	5	5	5	5	3	3	2	1	1	3	3	3	3	2	1	3	3	2	2	5	5	5	5
1	22	1	2	2	3	4	3	5	4	3	4	5	5	2	1	1	1	1	2	2	1	1	2	4	5	5	3	3	5	3	4	4	1	2	1	2	2	3	1	2	1	2	1	1	1	2	5	5	5
2	19	1	2	2	4	4	4	4	4	4	3	4	3	3	2	2	2	2	3	2	3	3	3	4	4	4	3	2	4	3	2	3	2	3	3	3	3	2	2	2	2	2	2	1	2	3	3	2	4
1	19	2	7	2	4	3	4	3	5	2	4	3	5	1	1	2	2	5	2	3	2	2	4	4	4	5	3	5	5	3	4	4	1	2	2	4	1	2	2	2	1	2	2	3	2	1	4	4	4
2	19	1	4	2	5	4	4	5	5	4	4	4	5	1	1	1	1	1	1	2	1	1	3	3	3	3	4	3	5	4	3	1	1	1	2	5	2	4	2	1	1	1	2	2	1	2	4	5	5
2	20	2	9	2	5	5	3	3	5	3	3	4	5	1	1	1	1	1	1	1	1	1	5	5	4	4	4	3	4	2	2	2	3	1	1	1	1	3	3	1	1	1	1	2	1	1	4	5	4
2	20	2	9	2	4	4	5	5	5	4	2	4	5	2	1	1	1	2	1	1	2	1	4	4	3	4	4	5	4	2	3	1	1	2	1	2	1	2	2	1	1	2	2	1	1	2	3	4	5
1	22	2	4	2	3	4	3	3	3	3	3	3	3	2	4	2	1	3	4	1	1	1	4	4	4	4	3	4	5	3	2	2	2	1	1	2	2	3	3	2	2	2	3	3	3	3	3	4	2
1	24	1	6	2	3	4	4	5	5	4	1	4	4	1	1	1	1	2	1	1	1	1	3	3	3	4	2	2	5	5	5	5	5	1	3	4	2	5	5	3	3	3	4	4	4	5	5	5	5
1	25	1	2	2	3	4	2	1	4	4	5	2	4	4	4	1	1	1	1	1	1	1	5	5	5	5	5	4	5	5	5	5	5	5	5	5	5	5	5	5	5	5	5	5	5	5	5	5	5
1	24	1	10	2	3	5	3	3	5	5	3	5	4	1	1	1	1	1	1	1	1	1	5	5	5	5	5	5	5	3	1	2	2	1	2	1	1	2	2	2	2	1	1	1	1	1	1	5	5
2	20	2	12	2	1	1	1	2	2	3	5	5	3	4	4	2	3	5	3	4	5	4	1	1	1	2	3	3	3	3	4	3	4	3	3	3	4	4	3	3	5	3	2	1	3	3	5	5	4
1	20	2	6	2	3	5	3	5	5	3	2	5	5	1	1	2	1	1	2	1	1	1	3	5	3	3	3	3	4	4	1	1	4	2	5	3	3	4	3	3	1	2	1	1	3	1	5	5	5
1	25	2	6	2	2	4	3	5	4	3	2	3	5	1	1	1	1	3	2	1	3	2	3	5	4	3	4	5	5	4	5	3	4	1	1	3	3	3	5	2	3	2	1	1	1	2	5	5	5
2	19	2	4	2	4	4	3	3	4	4	3	4	3	2	1	1	1	1	1	1	1	1	4	4	4	4	3	4	4	2	2	2	1	3	1	2	1	1	1	3	2	3	1	2	1	3	5	5	5
1	18	2	3	2	3	3	2	2	3	2	2	2	3	3	2	2	2	3	1	5	2	2	4	3	5	4	3	3	5	3	2	2	2	2	2	4	3	2	2	3	3	2	4	3	3	2	4	4	5
1	23	1	7	2	3	3	4	3	4	3	2	3	4	1	1	1	1	1	1	1	1	1	4	5	4	4	4	3	5	2	3	3	4	1	1	2	2	2	2	1	2	3	1	1	1	2	4	4	4
2	18	1	1	2	4	4	4	4	5	4	2	5	5	1	1	1	3	5	1	3	1	1	2	5	3	3	4	3	4	5	4	2	3	4	2	2	2	1	4	2	4	3	1	4	3	1	4	5	5
2	18	1	4	2	5	3	4	2	4	5	3	2	3	2	1	2	1	3	1	1	1	2	2	3	3	1	2	1	4	5	5	3	1	4	1	3	2	4	3	1	5	3	3	1	4	5	5	5	5
2	19	1	5	2	5	5	4	4	3	3	4	4	5	2	1	1	2	1	1	1	1	1	2	4	3	3	3	2	5	2	3	2	3	2	1	3	2	1	4	4	3	2	3	3	4	2	4	5	5
2	19	1	3	2	2	3	3	3	3	3	3	3	3	3	2	1	1	1	1	3	1	1	4	5	5	4	4	3	5	2	3	3	3	4	3	3	3	2	3	3	3	3	2	2	2	3	5	5	5
2	18	2	6	2	5	4	3	2	3	3	4	4	4	1	3	1	1	1	1	1	1	1	5	5	5	4	4	3	4	3	3	3	3	3	3	3	2	2	3	3	3	3	3	2	3	3	2	3	5
1	27	1	16	2	2	3	3	4	5	2	3	4	4	2	1	1	1	1	1	1	1	2	2	5	3	4	4	2	5	2	1	2	2	2	1	2	1	2	3	2	2	2	1	1	1	1	5	4	4
1	23	2	7	2	4	4	3	3	5	2	2	4	5	1	1	1	1	1	1	1	1	1	4	5	3	4	3	4	5	3	2	1	1	1	1	2	2	1	1	1	1	2	1	1	1	1	4	5	4
2	22	1	3	2	2	3	3	3	4	3	1	3	4	4	3	3	3	3	1	2	4	4	4	4	3	2	4	4	3	5	4	2	5	5	3	5	3	2	4	5	4	5	5	5	5	5	4	5	5
1	22	1	3	2	5	5	5	5	5	5	4	5	1	1	1	1	1	1	1	1	1	1	3	5	4	4	4	4	5	3	4	2	1	1	1	1	1	1	1	1	4	2	1	1	1	1	5	5	5
2	23	2	6	2	3	3	3	3	3	3	3	3	3	2	1	1	1	1	1	1	1	1	4	4	4	4	4	3	4	2	2	1	1	2	1	1	1	2	1	1	1	2	1	1	1	1	3	4	4
1	25	1	8	2	3	3	3	4	4	4	3	3	4	4	2	2	1	1	1	1	1	1	3	3	4	4	4	4	5	3	2	2	1	2	1	2	1	3	2	1	2	1	1	1	2	1	4	4	4
1	19	2	8	2	4	4	2	3	4	2	3	4	4	1	1	1	1	1	1	1	1	1	5	5	5	5	4	4	5	3	3	3	5	2	2	1	1	1	1	1	1	1	3	2	2	2	5	5	5
1	22	2	10	2	3	4	3	3	2	2	3	1	4	4	5	5	4	3	4	4	4	3	1	3	1	5	5	4	3	2	3	1	1	2	2	2	2	3	2	3	3	4	2	2	1	2	2	1	4
1	19	2	3	2	4	4	4	4	4	4	4	4	4	2	2	2	2	2	2	2	2	2	4	4	4	4	5	4	5	2	2	2	2	2	3	3	3	2	3	2	2	3	2	2	2	2	4	4	4
2	23	1	12	2	5	4	4	3	4	5	5	5	5	1	1	1	1	1	2	1	1	1	4	4	4	3	4	4	5	4	2	1	2	3	1	1	1	2	2	1	2	2	2	1	2	2	5	5	5
2	23	2	4	2	2	3	4	4	3	4	1	2	4	2	1	1	2	4	1	1	2	2	2	4	4	5	3	1	4	4	5	4	1	1	1	3	2	4	2	2	2	2	4	4	2	2	5	5	5
1	25	1	15	2	5	5	4	3	4	2	3	4	4	2	1	1	1	1	1	1	1	1	5	5	5	5	5	3	5	2	3	3	2	2	1	3	1	2	2	2	2	2	1	1	2	2	5	5	5
1	25	2	14	2	3	4	4	4	4	4	3	4	5	1	1	2	1	2	2	1	2	2	2	4	3	4	4	3	5	4	3	3	2	2	2	2	4	4	2	3	3	3	4	3	3	5	4	5	5
1	22	2	3	2	3	3	3	2	4	3	4	3	4	2	2	1	1	1	1	1	1	1	3	3	2	3	3	3	4	3	3	3	2	2	2	3	3	3	3	3	2	2	2	3	2	2	3	3	4
1	33	1	6	2	5	5	5	3	5	5	4	5	2	1	1	1	1	1	1	1	1	1	5	5	5	5	5	5	5	4	1	1	1	1	1	1	1	1	1	1	1	1	1	1	1	1	3	4	5
1	23	1	5	2	4	4	5	4	5	4	4	5	5	2	1	1	1	1	1	1	1	1	4	5	4	4	4	3	5	3	3	1	2	1	1	1	1	1	1	1	1	1	1	1	1	1	4	4	4
1	25	1	13	2	3	3	2	1	2	4	1	4	2	1	1	1	1	1	1	1	1	1	1	4	2	5	5	5	5	1	1	1	5	1	3	2	1	1	1	1	1	1	1	1	1	1	1	1	5
1	23	2	5	2	1	3	1	3	2	3	2	1	3	1	1	1	1	1	1	1	1	1	5	5	5	5	5	3	5	1	3	1	1	1	4	1	1	1	1	1	1	1	1	1	1	3	5	5	5
1	23	1	6	1	4	4	5	5	3	3	2	4	3	4	3	2	2	1	3	3	4	4	3	5	4	4	3	5	5	5	5	1	1	1	1	1	2	1	1	1	2	3	3	2	3	1	3	2	4
2	18	1	6	2	2	2	2	4	5	3	4	4	5	1	1	1	1	1	1	1	1	1	4	3	2	2	2	2	4	3	2	2	1	1	1	2	1	3	2	1	2	1	1	1	2	1	5	5	5
1	22	1	2	2	2	4	3	2	4	3	3	3	3	2	1	1	1	1	1	1	1	1	2	4	4	4	4	3	5	3	3	2	2	2	1	1	2	2	2	1	2	2	1	2	2	2	4	4	5
2	22	2	8	2	4	5	3	5	4	2	2	3	5	1	1	1	1	2	1	1	1	1	2	5	4	5	5	3	5	4	3	2	2	1	2	1	1	2	3	3	2	1	1	3	2	2	5	5	5
2	20	2	1	2	4	5	5	4	4	4	2	4	5	1	1	1	1	1	1	1	1	1	5	5	5	5	5	5	5	4	2	2	1	3	1	3	1	2	4	1	1	1	1	1	1	1	5	5	5
1	22	1	3	1	4	3	5	4	5	4	3	4	4	1	1	1	1	1	1	3	1	1	3	4	3	4	4	3	5	3	3	2	1	1	1	1	1	1	1	1	1	2	1	1	1	2	5	5	4
1	22	2	5	2	2	3	2	2	2	1	1	3	3	1	1	1	1	1	1	1	1	1	3	4	5	5	3	3	5	2	1	1	4	1	1	1	1	1	1	1	1	1	1	1	1	1	5	5	5
1	22	2	3	2	2	3	3	4	4	3	3	4	4	2	2	2	2	3	2	4	2	2	2	3	4	3	4	4	4	4	3	3	4	3	1	3	3	3	1	2	2	3	2	1	3	3	4	4	5
1	20	2	6	2	3	3	3	2	4	3	3	3	3	3	3	3	4	3	2	2	2	2	4	4	4	3	4	3	4	2	2	2	2	2	1	2	1	2	2	2	2	2	1	2	2	2	4	4	4
1	24	2	15	2	3	4	2	2	5	3	2	3	5	1	1	2	1	1	1	3	2	1	3	5	5	4	5	2	5	4	3	2	3	1	3	1	3	4	2	2	2	2	1	1	1	3	1	5	5
2	22	1	9	1	4	4	5	4	3	4	4	4	5	5	1	1	3	3	3	3	1	2	3	2	2	2	3	3	3	5	4	3	1	2	1	3	3	4	2	2	4	4	4	3	3	5	5	5	5
1	18	2	6	2	3	4	3	4	4	3	3	4	4	1	1	1	1	2	1	1	1	1	3	4	4	4	4	3	5	3	2	2	2	1	1	1	1	1	1	1	1	1	1	1	1	3	3	4	4
1	18	2	6	2	4	4	4	4	4	5	4	4	4	4	1	1	1	1	1	4	1	1	5	4	4	3	4	4	4	3	2	2	1	3	3	1	2	2	2	2	2	2	2	2	2	2	2	2	3
1	18	2	7	2	5	5	4	5	5	4	3	5	5	2	1	1	1	1	1	1	1	2	5	4	4	4	5	4	5	4	4	3	3	1	3	3	4	1	1	3	1	1	1	2	2	1	4	5	5
2	20	1	3	2	2	1	2	1	2	1	1	1	2	4	3	3	4	4	4	2	4	5	2	2	2	3	2	2	2	3	3	2	4	4	4	2	2	3	3	2	2	4	2	1	3	4	3	3	2
2	18	1	1	2	5	4	4	3	3	3	2	4	3	1	1	1	1	1	1	1	1	1	3	4	3	4	4	3	5	4	3	2	2	1	1	1	1	1	3	5	5	3	3	3	4	4	5	5	5
2	25	1	17	1	4	4	3	4	4	3	2	5	3	1	1	1	1	1	1	1	1	1	5	5	4	4	4	5	5	3	1	1	1	1	1	1	2	1	1	1	1	1	2	1	1	2	5	5	5
1	24	1	1	2	4	5	5	5	5	4	4	4	5	1	1	1	1	1	1	1	1	1	3	5	5	5	5	3	5	1	1	1	1	1	1	1	1	1	2	1	2	1	1	1	1	1	3	5	5
1	19	2	2	2	3	5	4	5	3	4	4	4	3	3	3	3	2	3	2	3	3	2	3	4	4	4	4	5	5	3	2	2	3	1	1	1	1	2	2	2	2	3	2	2	2	2	3	4	4
1	24	2	11	2	1	4	3	3	4	3	1	3	5	1	1	1	1	1	1	1	1	2	4	5	3	3	3	2	5	2	3	3	2	1	1	2	1	2	1	1	1	1	1	1	1	1	1	2	4
1	24	2	9	2	5	5	4	5	5	5	4	4	5	1	1	1	1	3	1	1	1	2	5	5	5	4	5	3	5	2	3	2	1	1	1	3	1	1	2	1	1	2	2	1	1	2	3	5	5
1	23	2	3	2	1	2	3	3	3	2	2	3	3	3	5	2	2	2	5	3	2	2	1	5	2	2	2	3	3	4	3	5	4	2	2	2	2	2	3	3	3	5	2	2	2	3	5	5	5
1	20	2	6	2	3	4	4	3	3	3	2	3	4	1	1	1	1	2	2	2	2	1	2	3	3	4	4	4	4	3	3	3	2	3	2	2	2	2	2	2	2	2	2	1	3	3	3	4	5
1	22	2	6	2	1	3	4	3	3	4	3	3	4	4	4	3	3	4	4	3	2	1	4	4	4	3	5	3	5	4	4	4	3	5	1	4	1	1	3	3	3	3	1	1	3	2	3	3	4
1	22	1	11	2	4	4	3	1	4	2	1	3	3	1	1	1	1	1	1	1	1	1	4	5	4	4	4	3	4	2	2	2	3	1	1	2	2	2	2	2	1	2	2	1	2	2	4	4	4
1	23	2	9	2	5	4	5	5	5	2	1	4	5	2	1	1	1	1	1	1	1	1	5	5	5	4	2	3	5	3	4	3	1	3	1	3	2	2	3	1	3	1	1	1	1	4	5	5	5
1	26	1	3	2	5	5	3	4	5	5	4	4	5	2	1	1	1	1	1	5	1	1	5	5	5	5	5	3	5	3	2	2	2	1	1	1	1	2	1	1	1	1	1	1	1	3	5	5	5
2	24	1	11	2	3	3	3	5	4	3	1	3	3	2	1	3	1	1	1	1	1	3	3	4	3	3	3	3	3	3	2	3	1	3	1	3	2	1	3	2	3	1	2	3	3	1	5	5	5
1	23	1	3	2	3	4	5	5	5	4	2	2	3	3	3	2	2	2	2	3	5	3	2	3	3	2	3	4	3	2	3	2	1	3	3	4	5	3	3	2	3	2	3	4	3	2	3	3	3
2	24	1	14	2	2	4	2	2	3	2	1	2	1	3	1	2	1	1	1	1	1	1	3	4	3	3	3	3	4	3	2	1	1	1	2	1	1	1	1	1	1	1	2	1	2	2	3	3	4
2	23	1	12	2	1	3	3	2	3	2	2	2	4	3	2	2	3	3	4	3	3	4	3	3	2	2	3	4	3	5	3	3	4	5	5	5	5	5	5	5	4	5	5	5	5	5	5	5	5
2	22	1	5	2	3	3	3	4	2	5	3	4	2	4	5	2	3	5	2	4	3	2	3	5	5	3	2	5	1	5	5	5	3	4	2	4	2	4	2	4	3	3	2	3	4	2	3	2	2
1	22	1	7	2	3	3	3	4	4	3	4	4	4	1	1	1	1	1	1	1	1	1	4	4	4	4	2	4	3	3	3	4	2	2	2	3	2	2	3	2	2	2	1	1	3	2	5	5	4
2	22	2	5	2	5	5	5	5	5	5	5	5	5	2	1	1	1	1	1	1	1	1	5	5	5	5	5	5	5	4	2	2	3	2	2	1	2	2	1	1	1	2	1	1	1	1	4	5	5
2	23	1	10	2	4	4	4	3	4	3	3	4	4	1	1	1	1	2	1	1	1	3	4	4	4	3	4	4	4	4	3	2	2	2	1	2	2	2	2	2	2	2	1	2	2	2	2	5	5
2	23	1	9	2	3	3	4	3	3	2	4	4	5	3	2	3	3	3	2	2	3	3	4	4	2	2	3	4	3	4	4	5	3	4	3	3	3	2	4	4	5	5	4	4	4	3	3	3	5
1	19	2	9	2	2	4	3	4	4	3	3	4	3	2	2	2	1	2	1	1	1	2	3	3	3	3	4	4	3	3	5	2	4	1	1	3	1	2	2	2	3	1	1	1	2	2	5	5	5
1	25	1	2	2	4	4	2	4	4	4	1	4	5	2	1	3	1	2	1	3	2	2	5	4	4	5	5	3	5	4	1	4	2	1	1	1	1	2	2	1	2	1	2	1	1	4	4	4	5
1	23	2	10	2	3	4	3	2	4	2	4	4	1	1	1	1	3	2	3	1	1	1	5	5	4	3	4	4	4	2	3	3	2	1	2	2	2	3	3	1	2	2	2	3	2	2	5	5	5
2	19	2	5	2	3	4	5	4	4	4	3	4	5	1	1	1	1	1	1	1	1	1	5	5	5	5	5	4	5	5	4	4	2	4	1	3	1	1	3	3	1	4	2	1	2	1	4	4	4
1	22	1	8	1	4	4	5	4	4	4	5	4	4	4	4	4	4	4	5	4	3	4	4	4	4	5	4	4	5	4	3	2	2	3	2	3	2	3	2	2	2	2	2	3	3	3	3	2	4
1	27	2	12	2	1	5	5	4	5	5	3	5	5	1	1	1	1	1	1	1	1	1	3	5	5	5	5	3	5	2	2	2	5	2	1	1	1	1	1	1	1	1	1	1	1	1	5	5	5
2	23	2	3	2	3	3	3	3	4	3	2	3	3	2	3	2	2	2	3	3	2	2	3	3	2	4	4	3	4	3	3	1	2	1	2	2	2	1	2	2	2	2	2	2	2	1	4	4	4
2	23	2	3	2	3	3	3	3	4	3	2	3	3	2	3	2	2	2	3	3	2	2	3	3	2	4	4	3	4	3	3	1	2	1	2	2	2	1	2	2	2	2	2	2	2	1	4	4	4
1	20	1	4	2	3	3	4	3	4	2	3	4	4	3	2	1	1	1	1	1	1	1	3	4	4	3	4	2	5	3	2	2	2	2	3	2	2	3	1	2	2	2	2	1	1	1	4	4	4
1	23	2	8	2	4	3	4	3	4	5	3	2	5	4	3	5	3	2	4	3	3	4	4	3	4	3	4	4	4	3	4	3	4	3	3	4	3	4	3	4	3	3	4	3	4	2	4	2	3
1	22	2	10	2	3	3	3	4	4	4	3	3	4	3	3	3	4	3	3	3	3	3	4	5	3	3	4	4	5	3	3	3	3	4	4	4	5	4	3	2	3	3	3	3	3	3	3	3	5
2	20	1	10	2	3	2	3	2	3	2	2	3	3	4	3	3	2	2	1	1	2	4	2	3	2	3	2	2	4	3	3	3	4	3	2	2	3	3	4	3	4	2	2	2	4	2	3	3	4
1	26	1	16	2	4	4	4	4	5	5	1	3	2	1	1	1	1	1	1	1	1	1	2	4	4	3	1	3	5	2	1	1	1	2	1	1	1	2	1	1	1	1	2	1	1	3	5	5	5
2	22	2	14	2	3	4	4	4	4	3	4	4	4	1	1	1	1	1	1	1	1	1	3	3	3	3	3	3	4	2	2	2	2	1	1	1	1	1	1	2	2	1	1	1	1	1	4	4	4
2	23	2	5	2	3	4	2	2	4	2	1	4	3	2	1	2	1	5	1	1	1	3	3	4	2	2	2	3	4	3	3	3	4	4	1	2	1	4	3	2	2	2	1	1	3	2	3	3	4
1	23	2	10	2	1	5	4	4	4	3	2	2	3	4	4	4	3	3	2	4	4	4	4	4	3	4	4	4	5	5	3	3	3	4	3	4	4	4	3	3	4	4	1	1	1	1	4	5	4
1	22	1	8	2	3	4	2	4	3	3	2	4	5	2	1	1	1	1	1	1	1	1	4	5	5	4	2	2	4	5	3	4	2	1	1	1	1	3	2	1	1	1	1	1	1	3	5	5	5
2	20	2	9	2	4	4	3	3	4	4	3	3	4	2	3	2	1	1	1	4	1	1	4	4	5	4	3	3	4	2	2	3	1	1	1	1	1	2	2	1	2	2	3	2	1	3	3	4	4
2	23	1	6	2	1	1	4	1	1	1	1	1	4	1	1	1	2	1	1	1	1	1	3	5	4	4	3	1	5	3	4	2	2	1	1	3	1	4	4	2	2	1	1	2	1	2	5	5	5
1	28	1	10	2	5	5	5	5	5	5	5	5	5	1	1	1	1	1	1	1	1	1	5	5	5	5	5	5	5	5	3	3	1	1	1	1	1	3	1	1	1	1	1	3	1	1	5	5	5
2	20	2	10	2	4	4	2	4	5	3	4	4	5	1	1	1	1	1	1	1	1	1	4	4	3	3	4	5	5	3	2	2	1	1	1	2	1	3	2	1	2	1	1	1	2	1	5	5	5
1	23	2	12	2	2	4	3	2	4	2	2	4	5	2	1	1	1	3	1	2	5	4	1	5	4	5	2	1	4	2	3	3	1	1	2	1	3	5	1	3	3	5	5	4	4	1	5	5	5
2	24	1	13	2	1	3	1	4	3	1	1	4	2	5	3	3	1	5	2	2	4	5	2	1	2	4	3	2	4	3	4	4	5	1	1	4	3	3	1	3	4	5	5	3	1	1	2	5	4
1	24	1	8	2	5	5	5	5	4	3	5	5	5	4	5	3	3	5	5	3	4	5	5	5	4	5	5	4	5	1	1	1	1	1	1	2	2	1	2	2	3	1	1	1	1	1	1	1	5
1	22	2	8	2	5	4	4	4	4	3	3	4	4	3	1	2	2	3	1	1	1	2	4	4	3	3	3	4	3	3	2	2	3	1	2	3	2	2	4	4	4	4	5	3	4	2	5	5	5
1	24	2	4	2	2	4	1	2	5	2	4	4	4	2	1	1	1	1	1	1	1	1	3	4	3	2	5	4	5	4	3	4	2	2	2	2	4	2	2	3	1	1	1	1	1	3	5	5	5
2	24	1	4	2	3	4	5	3	4	4	3	5	4	2	1	3	1	3	4	2	1	1	3	3	4	2	3	3	4	3	3	2	3	3	2	1	4	2	4	2	3	2	3	2	4	3	3	3	3
1	23	2	8	2	4	4	4	3	3	2	3	3	4	2	2	2	1	1	1	1	2	1	2	4	3	4	4	3	4	2	3	2	3	1	3	3	1	2	2	1	2	1	2	2	1	1	3	4	4
1	22	2	5	2	5	5	4	4	4	3	3	3	5	1	1	1	1	3	1	1	1	3	4	4	3	4	5	3	5	4	3	3	3	1	1	3	3	3	3	3	3	3	3	3	3	1	5	5	5
2	23	1	9	2	5	5	4	4	4	4	3	3	3	1	1	1	1	1	2	1	2	2	3	5	5	5	5	4	5	3	4	4	3	3	3	3	3	3	3	2	4	3	1	1	2	2	5	5	5
1	23	1	5	2	2	4	3	2	4	3	1	2	4	2	1	2	2	2	1	1	1	2	4	4	3	4	5	4	5	4	1	2	2	2	1	2	2	4	3	3	3	2	1	2	2	1	5	5	4
2	23	2	1	2	4	4	3	4	4	4	3	4	4	2	1	1	1	2	1	1	1	1	4	4	4	4	4	4	4	2	2	1	3	3	1	1	2	2	2	1	2	2	1	2	2	2	4	5	5
1	24	2	10	2	1	2	4	2	1	1	1	1	1	1	1	3	2	2	3	2	2	2	3	4	3	4	3	3	5	1	1	1	1	1	1	5	3	2	2	3	2	4	1	1	1	3	5	5	5
2	23	1	5	2	3	4	4	3	4	3	3	3	4	2	2	3	3	3	2	4	2	2	3	4	2	3	3	3	4	3	3	3	4	3	2	3	3	3	2	3	2	3	2	2	3	2	4	4	3
2	21	1	14	2	3	4	4	3	4	4	1	4	4	3	1	1	1	1	1	1	2	1	5	5	4	4	3	1	5	5	4	1	1	1	1	5	2	1	4	4	4	3	1	4	4	3	4	5	5
2	19	1	9	1	3	3	4	4	4	2	2	4	3	2	1	2	3	2	1	2	1	3	4	4	4	3	4	3	4	5	4	3	2	2	1	2	2	4	3	2	3	2	2	2	3	2	3	4	4
2	24	2	13	2	5	5	5	5	5	5	5	5	5	1	1	1	1	1	1	1	1	1	5	5	5	5	5	5	5	5	3	3	2	3	3	2	5	3	3	3	3	3	3	3	2	3	3	3	3
2	24	1	6	2	5	5	4	5	5	4	5	5	5	1	1	1	1	1	1	1	1	1	4	4	2	4	4	3	5	2	2	3	3	3	1	5	2	3	2	2	2	1	1	1	2	2	5	5	5
2	18	2	3	2	3	4	5	3	3	3	2	3	3	1	1	1	1	1	1	1	1	1	3	3	3	3	1	3	5	3	2	1	1	1	1	2	1	2	1	1	1	1	1	1	1	1	1	1	5
2	18	1	7	2	5	5	3	5	5	5	5	5	5	1	1	1	1	1	1	1	1	1	5	5	5	5	5	5	5	3	2	3	3	3	5	3	1	3	3	3	3	4	1	1	1	3	3	5	4
2	22	1	8	2	4	4	4	5	4	4	4	4	4	2	1	1	1	1	1	1	1	1	3	4	4	3	3	4	5	3	2	3	2	3	2	2	2	1	2	1	1	2	1	2	2	2	5	5	5
2	19	2	3	2	3	4	3	3	3	2	5	3	5	1	1	1	1	1	1	1	2	1	2	3	3	3	3	3	5	3	3	2	1	1	3	1	1	1	1	2	1	1	1	1	3	1	3	5	5
1	18	1	9	2	4	5	4	4	5	4	3	4	5	1	1	1	1	2	1	3	1	2	3	3	4	3	4	4	4	2	3	4	2	2	3	2	4	1	3	1	4	2	4	2	3	5	2	1	2
2	18	1	6	2	5	5	5	4	5	5	5	5	5	1	1	1	1	1	1	1	1	1	3	3	3	3	3	5	5	3	3	2	5	2	1	2	2	1	2	2	2	1	1	3	2	4	5	5	5
2	18	1	7	2	3	3	4	3	4	3	4	3	5	3	2	2	3	1	2	3	4	4	4	5	5	3	4	4	5	2	4	3	3	2	4	4	5	3	3	4	4	2	2	4	3	2	4	5	5
2	18	2	7	2	3	5	5	3	4	3	5	3	5	1	1	1	1	1	1	1	1	1	4	3	4	3	4	3	5	5	3	2	1	1	2	1	1	1	2	2	2	2	2	1	2	2	5	5	5
2	18	2	7	2	5	5	4	5	5	4	4	5	5	1	1	1	1	1	1	1	1	1	4	3	3	3	3	4	4	4	2	2	3	2	1	2	1	3	2	2	1	1	2	1	1	3	3	4	4
2	19	1	6	2	4	4	4	4	4	3	2	4	4	1	1	1	1	3	1	1	1	1	1	4	3	4	4	3	5	4	3	3	2	2	1	1	1	1	3	3	3	2	2	2	2	4	5	5	5
2	18	2	10	2	5	4	3	4	5	5	5	4	5	1	1	2	1	1	1	1	1	1	4	5	3	4	3	3	5	3	2	2	1	1	1	1	1	2	2	1	1	2	1	1	1	1	5	5	5
1	18	2	6	1	5	5	3	5	5	5	3	5	5	1	3	1	1	1	1	1	1	1	5	5	5	4	4	4	5	1	3	2	3	1	1	1	1	1	1	1	1	1	1	1	1	3	5	5	5
2	18	1	7	2	4	4	4	4	4	4	4	4	4	1	1	1	1	2	1	1	1	1	2	4	4	4	2	3	5	3	5	4	3	3	1	2	3	3	3	2	3	1	1	3	2	3	5	5	5
1	19	2	7	2	5	5	3	5	5	5	3	5	5	1	3	1	1	1	1	1	1	1	5	5	5	4	4	4	5	1	3	2	3	1	1	1	1	1	1	1	1	1	1	1	1	3	5	5	5
1	18	1	9	1	4	5	3	5	5	3	4	5	5	2	1	1	2	2	2	2	2	2	5	5	3	4	4	4	4	2	4	3	4	3	5	5	3	4	3	5	5	5	5	5	5	5	5	5	5
2	21	2	10	2	1	2	2	2	5	1	1	1	5	1	1	3	3	3	2	1	1	1	3	4	3	3	5	4	5	5	5	5	2	4	3	3	2	2	3	3	3	2	2	4	3	2	5	5	5
1	19	2	6	2	5	5	4	4	4	5	4	5	4	2	1	2	2	2	1	3	1	2	4	5	5	4	4	2	4	3	3	3	2	1	2	4	3	3	2	2	2	2	1	2	3	2	4	5	5
1	18	1	10	2	5	5	4	4	5	4	1	4	4	4	3	3	1	1	1	5	1	1	3	4	4	4	4	3	5	1	1	2	1	4	1	2	5	2	4	5	1	2	3	4	1	2	2	3	2
2	18	1	10	2	2	4	3	3	3	4	2	3	2	4	2	5	4	5	1	2	2	3	3	2	5	4	3	4	5	5	4	3	1	1	2	3	3	4	3	3	2	2	1	2	3	1	4	5	5
2	20	1	10	2	4	5	3	5	5	4	3	3	5	2	1	2	2	1	1	1	2	2	5	5	4	4	4	2	5	3	5	4	2	1	2	3	3	2	2	2	3	2	3	2	2	1	5	5	5
1	21	1	1	2	2	3	4	2	5	3	4	4	4	4	2	2	1	1	2	1	1	2	4	4	3	3	4	2	4	4	2	3	1	1	1	2	3	1	3	3	2	2	3	4	4	2	3	3	3
1	21	1	2	2	5	5	5	5	5	5	5	5	5	1	1	1	1	1	1	1	1	1	5	5	5	5	5	5	5	5	3	2	2	4	2	4	1	1	3	1	1	1	1	2	1	2	5	5	5
1	21	2	8	2	5	5	4	5	5	4	3	4	5	1	1	1	1	1	1	1	1	1	4	4	3	3	4	4	5	3	3	3	2	1	1	2	2	2	2	1	1	2	2	2	1	2	5	5	5
2	19	2	3	2	3	3	3	3	3	5	5	4	4	3	1	1	1	1	1	1	1	1	3	5	5	5	3	5	5	1	1	1	1	3	3	3	3	3	2	3	4	5	3	5	3	2	1	3	5
1	22	1	6	1	4	4	3	5	3	3	4	4	3	2	1	1	1	2	1	1	1	1	3	4	2	3	3	1	5	3	2	3	4	1	1	1	1	4	3	1	1	2	1	2	2	4	5	4	5
2	22	2	12	2	3	4	4	4	4	4	2	5	5	2	1	1	1	2	2	1	1	2	3	4	4	4	4	4	5	4	3	2	2	2	2	2	2	2	2	3	3	2	2	1	2	2	5	5	5
1	22	2	4	2	4	4	4	3	4	4	2	4	4	1	1	1	1	2	1	1	1	1	5	3	3	4	4	4	5	2	2	1	3	2	2	1	2	3	5	1	5	1	2	2	2	1	5	5	5
2	23	1	5	2	3	4	2	3	3	4	3	4	3	2	2	1	2	3	1	1	2	3	3	4	3	4	4	4	5	4	5	4	2	5	1	4	2	3	4	4	4	5	5	5	5	5	5	5	5
1	20	2	1	2	3	3	1	4	4	2	1	3	2	1	2	1	1	1	1	1	1	1	3	2	4	3	1	5	5	4	2	1	1	1	1	1	1	1	2	1	2	3	1	1	1	1	5	5	5
1	20	1	1	2	2	5	5	4	5	4	3	5	5	1	1	1	1	2	3	1	1	2	4	5	4	4	4	2	3	2	4	2	3	1	1	2	2	3	2	3	2	2	2	2	1	2	5	5	5
1	19	2	7	2	4	5	5	4	5	5	5	5	5	1	1	1	3	1	1	1	1	1	5	5	4	3	5	5	5	3	4	5	3	1	1	3	1	1	3	3	4	3	1	4	3	1	5	5	5
1	21	1	4	2	5	5	1	5	5	5	5	5	5	1	1	1	1	5	1	1	5	1	5	1	5	1	5	1	5	5	1	2	1	4	4	1	5	5	5	1	3	2	1	1	2	5	5	5	5
1	19	2	9	2	2	3	4	4	3	5	3	2	4	1	5	5	3	4	5	3	5	3	5	5	5	5	4	4	3	1	2	3	5	3	3	5	3	3	3	4	4	4	3	2	2	4	3	4	2
1	19	1	4	2	5	5	5	5	5	5	5	5	5	1	1	1	1	1	1	1	1	1	5	5	5	5	5	5	5	3	1	2	3	4	2	1	1	4	2	1	3	2	1	3	2	5	5	5	5
1	21	1	5	2	3	4	3	2	5	2	4	3	3	1	1	3	2	3	1	1	3	3	4	5	3	4	5	2	5	5	3	2	2	1	1	3	2	3	2	2	4	2	1	2	3	1	5	5	4
1	19	1	2	2	3	3	3	3	2	3	1	4	4	3	1	2	2	1	1	1	2	2	4	5	4	5	3	4	5	4	3	4	2	1	1	2	2	1	3	2	2	1	1	1	2	3	5	5	4
2	19	1	5	2	3	4	3	3	4	4	2	3	4	2	1	1	1	2	1	1	2	2	3	2	2	3	3	5	5	5	4	5	3	4	1	3	2	3	4	5	5	3	4	4	5	5	4	5	5
2	35	1	22	2	2	4	3	4	3	4	5	4	4	3	1	2	1	2	1	3	1	2	5	4	4	4	5	5	4	4	2	3	1	3	3	3	2	2	3	2	2	3	5	4	4	1	3	4	4
2	18	2	6	2	4	5	4	4	5	3	4	5	5	1	1	1	1	2	1	1	1	1	4	4	4	3	3	4	5	3	3	2	1	3	1	3	1	1	2	2	3	2	1	2	2	3	3	5	5
2	22	2	1	2	5	5	5	5	5	5	3	5	5	1	1	3	3	3	1	2	1	2	5	5	5	3	3	2	5	5	3	3	1	3	3	3	3	3	4	3	3	3	3	3	3	4	5	5	5
2	19	1	5	2	3	4	3	4	4	3	2	3	4	4	4	4	4	4	3	3	2	4	3	4	3	3	3	3	5	4	3	4	2	3	2	3	3	2	3	3	3	3	3	3	4	2	4	4	4
2	18	2	6	2	4	4	2	4	3	2	2	2	4	2	3	3	3	2	3	3	3	2	4	5	4	5	4	2	4	4	2	4	2	4	3	3	2	3	3	4	3	4	3	2	3	2	4	5	5
1	18	2	10	2	5	5	3	5	5	4	5	3	5	5	1	1	5	4	5	5	1	5	5	5	5	5	5	2	5	1	2	1	1	1	1	3	3	3	1	3	1	3	3	1	1	1	3	5	5
1	18	2	2	2	1	2	2	3	4	1	1	2	3	1	1	4	1	3	1	2	3	1	1	1	1	1	1	1	1	5	1	1	4	5	1	1	2	2	1	2	1	1	1	1	1	1	1	1	2
1	19	1	2	2	4	5	5	4	2	4	4	1	2	1	1	1	1	1	1	1	1	1	3	4	5	5	4	4	5	2	2	3	1	1	1	1	1	4	1	1	1	1	1	4	3	5	5	5	5
2	24	2	14	2	2	3	2	2	2	1	2	3	4	3	1	1	2	4	1	1	2	3	2	1	2	3	5	2	4	5	3	2	1	2	2	2	1	2	4	3	4	2	2	3	3	2	4	4	5
1	20	2	7	2	3	4	3	1	4	3	1	3	4	2	1	1	1	2	1	1	4	1	3	3	3	4	4	2	5	4	3	2	3	2	1	2	1	1	3	3	2	2	1	3	3	1	3	4	4
2	21	2	10	2	4	4	3	3	3	4	4	4	5	1	1	1	1	1	2	3	1	2	5	5	4	4	4	5	5	4	4	3	2	1	1	1	1	1	1	1	2	2	1	2	1	1	4	4	4
2	20	2	9	2	5	5	3	5	5	3	3	3	5	1	1	1	1	1	1	1	1	1	5	4	5	3	4	4	5	3	3	2	3	1	1	1	1	2	3	1	2	2	1	1	1	1	5	4	5
2	19	1	10	2	3	2	1	4	2	1	2	4	4	1	1	1	1	1	1	2	1	1	4	5	5	5	4	3	5	3	5	2	3	2	1	1	1	1	4	2	1	1	2	1	1	1	4	5	5
1	22	2	8	2	5	5	3	5	5	5	2	5	5	1	1	1	1	1	1	4	1	1	4	4	5	4	5	5	5	4	2	1	1	1	1	1	3	2	1	1	2	2	4	4	2	2	3	3	3
1	19	2	4	2	5	5	5	5	4	4	4	5	5	1	1	1	1	1	1	1	1	1	4	4	3	4	4	5	5	3	2	2	2	1	1	1	1	1	1	1	1	1	1	2	1	1	4	5	5
2	20	2	10	2	5	5	5	5	5	5	5	5	5	5	5	5	5	5	5	5	5	5	5	5	5	5	5	5	5	4	2	1	1	1	2	1	1	1	1	1	1	1	1	1	1	1	5	5	5
2	20	2	10	2	4	4	3	4	4	3	3	5	5	1	1	1	1	1	1	1	1	1	4	5	3	4	4	3	5	2	2	2	1	1	1	1	1	1	1	1	1	1	1	2	3	1	4	4	5
1	19	2	4	2	4	4	4	4	4	3	5	4	4	1	1	1	1	2	1	2	3	1	4	4	4	4	4	4	4	4	2	2	3	3	1	2	2	2	2	2	2	2	2	2	2	2	5	5	5
1	19	2	2	2	3	3	3	3	4	4	5	5	5	2	1	3	1	3	1	1	3	3	3	3	3	2	3	4	3	3	3	2	1	1	2	2	2	2	2	3	3	3	5	4	4	2	5	5	5
1	20	2	6	2	5	4	3	4	5	4	5	5	5	1	2	1	1	1	1	1	1	1	4	5	3	4	5	5	4	3	1	1	3	1	1	2	1	2	2	1	1	1	1	1	1	3	5	5	5
2	24	2	8	2	5	5	3	4	5	5	3	5	5	1	2	1	1	1	1	1	1	1	5	5	3	3	3	3	4	4	3	4	2	4	1	1	1	1	3	1	1	1	1	1	1	2	5	5	5
2	18	2	7	2	5	4	3	4	4	4	5	4	5	2	1	2	1	3	1	1	2	2	4	4	4	4	4	3	4	4	3	3	2	2	2	1	1	1	2	2	2	2	1	2	2	1	5	5	5
2	20	2	8	2	4	4	3	3	3	2	3	4	5	3	2	2	1	4	2	1	1	2	3	4	3	4	4	4	4	2	1	2	2	2	1	2	2	1	3	2	2	1	1	1	2	1	5	4	4
1	18	1	4	1	4	4	5	5	4	2	2	4	5	1	1	1	1	5	1	1	1	1	4	3	2	4	4	3	5	4	2	2	3	1	1	2	3	1	1	2	2	1	1	4	4	4	5	5	5
1	23	2	5	2	4	4	4	4	5	4	5	5	5	5	1	1	1	2	1	1	1	1	4	5	5	5	4	4	4	4	2	2	2	1	2	1	1	1	1	1	1	2	1	1	1	3	5	5	5
2	22	2	13	2	1	2	4	4	4	3	2	4	4	2	1	1	1	1	1	1	2	1	3	2	3	3	5	4	4	3	3	3	3	3	3	3	3	3	3	3	3	3	3	3	2	3	3	2	4
2	24	2	6	2	5	4	5	4	5	3	3	5	5	2	1	1	1	2	1	1	1	2	4	5	4	5	5	5	5	4	2	2	1	2	2	2	2	2	2	2	2	2	2	2	2	2	4	5	4
2	22	2	9	2	3	4	4	4	5	5	4	5	5	1	1	1	1	1	1	1	1	1	4	5	4	3	5	4	5	3	2	1	2	2	1	2	1	1	2	1	1	2	1	1	1	2	4	5	5
2	24	2	8	2	5	3	5	5	5	4	5	5	5	1	1	1	1	3	1	3	1	1	5	5	5	5	4	5	5	4	2	2	1	1	1	1	1	1	1	1	1	1	1	1	1	3	3	5	5
2	20	2	10	2	5	5	5	5	5	3	3	4	5	1	1	1	1	1	1	1	1	1	5	5	5	5	5	5	5	2	1	2	2	1	1	2	1	3	2	1	1	2	1	1	1	1	4	5	5
1	20	2	5	2	3	4	1	4	4	4	1	3	5	1	1	2	1	2	1	2	2	1	3	3	3	2	3	2	5	2	2	2	2	2	2	2	2	2	2	3	4	2	4	5	3	5	5	5	5
1	20	1	1	2	4	5	4	5	5	5	5	4	5	4	5	5	5	5	5	5	4	5	5	5	5	5	5	5	5	2	2	2	2	1	2	1	2	2	1	2	1	2	2	2	3	1	2	1	5
1	20	2	1	2	4	3	4	5	4	2	3	4	5	3	4	4	4	2	2	2	2	2	3	4	2	3	5	2	5	2	2	1	1	1	1	1	1	1	1	1	2	1	2	1	2	2	2	1	5
1	21	1	2	2	5	3	4	4	4	5	2	3	2	3	4	4	4	3	4	5	3	3	5	5	5	5	5	5	5	3	3	3	3	3	3	4	2	3	2	3	4	3	3	2	3	4	3	4	4
2	20	1	12	1	2	2	3	3	3	2	3	2	4	3	2	2	2	3	1	1	1	2	2	4	2	3	3	2	4	2	3	2	2	2	1	2	2	3	2	4	2	2	2	4	4	2	4	4	3
2	21	1	5	2	2	3	2	1	3	4	2	1	4	2	1	1	1	2	1	1	1	2	5	5	3	3	3	5	5	5	3	2	1	5	1	2	2	1	4	2	4	2	3	4	3	1	5	5	5
1	20	2	6	2	3	5	5	5	5	3	1	3	3	4	5	5	3	3	2	3	4	4	3	5	5	5	5	5	5	3	3	3	3	3	4	5	5	3	3	4	5	3	1	1	3	3	5	5	4
2	19	2	6	2	4	5	3	5	5	5	3	4	4	1	1	1	2	3	1	2	1	2	4	4	4	3	5	3	4	4	4	3	4	3	3	3	3	4	3	3	3	3	5	3	3	4	3	3	4
2	21	2	8	2	4	4	3	4	4	3	3	4	4	2	1	1	1	1	1	1	1	1	4	3	3	4	3	3	4	3	3	3	2	3	1	1	1	2	2	2	2	3	3	1	1	1	5	5	5
2	29	2	3	2	3	3	2	2	3	3	2	4	4	1	1	1	1	1	1	1	2	1	3	3	3	4	5	5	5	4	3	2	3	4	2	2	2	3	3	3	3	3	2	2	2	2	4	4	5
1	26	2	15	2	3	4	4	4	5	3	4	5	4	1	1	1	1	1	1	1	1	1	4	5	4	3	3	4	5	4	3	2	3	1	1	1	1	2	3	3	3	2	1	1	1	2	4	5	5
2	24	2	2	2	3	5	2	2	5	2	2	2	2	1	1	1	1	1	1	1	1	1	5	5	5	2	4	2	5	4	2	2	2	1	1	1	1	1	1	1	1	1	2	1	2	2	3	4	4
1	24	2	11	2	5	4	3	4	4	4	1	4	5	1	1	1	1	2	1	1	1	1	5	5	5	5	5	5	5	3	1	2	2	3	2	4	5	2	3	2	4	1	3	5	5	5	5	3	4
1	26	2	12	2	5	5	4	5	5	5	5	5	5	4	2	2	1	2	1	4	1	1	3	4	3	2	3	4	5	2	2	1	1	4	1	2	2	4	3	5	5	2	2	1	3	4	2	5	1
2	21	1	10	2	5	5	5	5	5	5	5	5	5	5	1	1	1	1	2	1	1	1	5	5	4	4	5	4	3	3	1	2	2	2	1	1	1	2	2	1	1	2	3	1	5	5	5	5	5
2	23	2	11	2	4	4	4	3	4	4	5	4	5	2	1	2	2	4	1	2	4	2	4	4	5	4	5	4	4	2	2	3	3	2	1	2	1	3	2	2	2	2	2	2	2	2	2	2	4
2	19	1	5	2	4	4	3	3	3	4	4	4	3	4	4	3	3	3	4	3	4	3	5	4	3	3	4	3	3	4	4	3	3	3	5	4	3	4	3	3	4	4	3	3	4	4	5	4	3
2	18	1	7	2	5	5	5	3	5	5	5	5	5	4	1	1	1	3	1	5	2	4	5	5	5	3	5	3	2	3	3	4	3	3	1	3	3	2	4	2	2	3	4	2	2	4	2	5	5
2	26	1	12	2	3	4	2	5	2	4	4	4	5	3	2	3	5	3	2	4	2	5	2	3	4	3	2	4	5	2	3	2	4	4	5	3	5	2	3	4	2	4	5	4	3	5	3	4	3
1	21	1	12	2	3	3	4	4	4	4	3	4	4	4	3	3	1	1	1	2	1	1	3	4	4	4	3	3	4	3	2	2	1	1	1	1	1	4	2	1	1	2	1	1	1	3	4	4	4
2	23	1	8	2	3	3	3	3	4	5	3	3	3	3	2	3	5	4	3	3	3	3	3	3	2	3	2	3	3	3	3	2	2	4	4	3	3	3	3	3	5	2	2	2	3	3	3	3	1
2	23	1	7	2	4	4	4	3	3	2	4	4	4	4	4	2	4	4	4	2	4	4	4	4	4	4	4	4	4	3	3	4	4	4	4	4	4	5	4	4	2	4	4	4	3	4	4	4	5
2	21	2	5	2	4	4	4	5	5	5	2	3	5	2	1	1	1	2	2	2	2	2	4	4	3	4	5	3	5	3	3	3	3	5	4	3	3	4	4	3	3	2	2	3	2	5	5	5	5
2	33	2	19	2	5	5	4	5	4	5	5	3	5	5	3	3	5	5	3	5	5	5	3	3	5	5	5	4	5	3	3	5	5	5	4	4	5	5	4	4	4	5	3	5	5	5	3	2	2
2	25	1	10	2	3	2	3	2	3	3	4	3	2	4	3	4	2	2	3	4	2	2	4	3	4	4	4	3	4	3	3	2	3	1	3	3	2	2	3	2	3	3	4	2	3	1	4	2	4
2	23	1	6	2	5	5	5	5	5	5	4	5	5	1	1	1	1	2	2	2	2	1	5	5	5	5	5	4	5	5	4	3	3	2	1	1	1	2	2	2	2	2	2	1	1	2	1	5	4
1	30	2	12	2	2	2	5	5	5	4	4	3	4	5	5	4	4	3	1	1	5	5	5	5	5	4	5	5	5	2	2	5	5	5	4	4	5	5	3	5	5	4	3	5	5	3	3	4	3
1	28	1	4	2	2	2	3	3	4	3	5	5	4	5	4	4	5	4	3	3	5	5	3	4	4	5	5	5	5	3	3	4	4	3	5	5	2	5	2	2	3	5	1	1	2	3	1	3	1
1	28	2	17	2	3	3	4	4	5	2	3	3	5	5	3	5	5	5	4	2	5	3	4	4	3	4	5	5	5	2	2	3	5	5	3	3	2	5	5	5	5	2	5	5	3	3	5	5	5
1	28	2	21	2	3	3	4	4	4	3	5	3	3	4	4	4	4	4	3	4	4	5	3	4	4	3	4	4	4	2	2	3	3	5	2	5	5	3	3	3	4	2	5	4	2	3	3	4	2
2	20	1	7	2	5	5	5	4	5	5	4	5	5	1	1	1	1	1	1	1	1	1	5	5	5	5	5	4	3	4	5	4	3	4	2	5	5	5	2	2	3	3	1	4	5	5	5	3	5
2	22	2	8	2	5	5	5	4	5	5	3	5	5	1	1	1	1	2	1	1	1	1	5	5	5	4	5	4	5	3	2	2	5	4	1	1	2	1	3	1	1	1	1	3	1	3	5	5	5
2	23	2	9	2	5	5	4	4	4	3	3	4	3	1	1	1	1	1	1	1	1	1	5	5	5	5	5	5	5	2	2	1	2	1	1	1	2	2	1	1	1	2	1	2	2	1	5	5	5
1	25	2	10	2	4	5	3	4	5	3	5	5	5	1	1	1	1	1	2	1	1	2	2	4	3	5	2	5	5	3	4	2	1	1	1	2	1	1	2	1	1	2	1	1	1	1	4	5	4
2	23	2	10	2	4	5	4	5	5	3	3	4	5	1	1	2	1	1	1	1	1	1	5	5	5	5	4	3	5	3	2	3	2	1	2	3	2	3	2	1	1	2	3	1	1	2	5	5	5
1	26	1	13	2	4	4	2	4	4	3	1	3	4	1	3	1	1	2	1	3	2	2	3	4	4	4	5	5	4	2	2	4	1	2	1	3	2	2	3	2	4	1	1	2	1	2	5	5	4
2	22	1	11	2	4	4	3	2	3	4	5	5	3	3	4	4	5	3	3	4	4	5	2	2	2	3	4	3	2	4	3	3	2	2	2	3	2	3	3	3	3	3	2	3	3	2	5	5	3
2	30	2	19	2	3	3	4	5	5	4	3	4	4	4	5	5	4	4	3	5	5	4	3	3	5	5	4	5	2	5	4	4	3	4	3	3	2	3	2	2	4	3	2	2	4	3	4	4	3
2	27	1	9	2	2	2	4	5	5	2	3	3	5	5	3	4	5	5	5	4	3	5	4	4	5	4	5	3	4	2	2	3	3	4	4	2	3	2	4	5	5	4	4	3	5	5	5	5	3
2	24	1	14	2	3	2	2	4	4	4	3	4	4	1	1	1	1	1	1	1	1	1	3	4	4	3	3	4	3	3	2	2	3	2	2	3	2	1	1	2	1	2	2	3	3	2	5	5	5
1	27	2	11	2	5	5	4	4	5	4	4	5	4	1	1	1	2	1	2	1	1	1	5	5	5	5	5	5	5	2	2	1	2	1	2	1	2	1	1	1	2	1	1	2	2	1	5	5	5
1	25	2	13	2	4	5	5	4	3	4	3	3	4	3	1	1	1	1	1	1	1	1	5	5	5	5	5	5	5	3	2	2	2	3	2	2	2	3	2	2	2	3	2	2	2	2	5	5	5
1	28	2	12	2	5	5	4	5	5	3	2	4	4	1	1	1	1	1	1	1	1	1	4	5	5	4	5	5	5	4	3	2	3	1	1	1	2	1	3	1	1	1	2	1	2	5	5	5	5
1	24	2	11	2	5	5	3	4	5	5	3	4	5	1	1	1	2	1	1	1	2	1	4	5	5	5	5	5	5	2	3	2	4	3	2	1	1	1	2	1	2	1	2	2	1	1	4	5	5
1	22	2	8	2	5	5	4	5	4	4	5	4	4	1	1	1	1	2	1	1	1	1	5	5	5	5	5	5	5	4	3	3	2	1	2	1	2	1	2	2	2	2	1	2	1	2	5	5	5
1	20	2	8	2	2	4	2	4	4	1	2	5	5	1	1	2	1	4	1	2	1	3	4	4	3	2	2	4	5	5	4	4	5	1	3	3	2	1	3	2	3	5	4	2	3	4	4	5	5
2	25	1	12	2	4	4	4	4	4	3	2	2	5	5	5	5	5	3	4	4	2	2	3	3	4	4	2	5	5	2	2	4	4	4	2	5	5	2	2	3	4	3	3	2	2	1	5	3	2
2	24	1	12	2	5	5	5	5	5	4	3	4	3	5	1	1	1	2	1	1	1	1	4	3	4	2	3	4	3	4	4	3	3	2	5	2	5	5	5	2	3	4	4	5	4	4	2	3	3
2	27	1	15	2	5	5	5	5	4	5	4	5	5	5	5	5	5	5	5	3	3	3	3	4	4	4	5	4	5	2	2	2	4	4	4	2	5	5	5	5	5	5	5	2	4	2	1	4	3
2	21	1	11	2	5	5	5	3	4	3	3	4	4	4	2	1	2	3	2	2	4	3	5	3	4	4	2	3	4	3	5	4	2	4	4	5	5	5	4	4	4	5	5	2	2	3	2	2	4
2	26	2	17	2	5	5	5	5	5	5	5	5	5	5	4	4	4	4	3	3	3	3	5	5	2	2	3	5	5	5	5	5	5	2	4	5	3	1	4	3	4	4	4	2	5	1	4	1	5
2	26	2	16	2	5	4	5	5	3	2	3	4	5	5	4	3	4	5	5	5	3	2	5	5	4	3	5	4	4	5	5	4	3	3	1	1	2	2	3	3	2	2	5	5	4	5	5	4	5
1	29	2	2	2	2	2	2	4	3	3	1	4	5	4	2	2	2	2	2	3	3	3	3	3	3	3	3	3	3	3	3	3	3	3	3	3	3	5	3	3	3	3	3	3	3	3	3	3	4
2	24	1	1	2	4	5	5	5	5	5	4	5	5	1	2	1	1	1	1	1	1	1	5	3	5	4	4	4	5	4	1	2	1	2	1	1	1	3	1	1	1	1	1	3	1	1	4	4	4
2	21	1	3	2	4	2	3	4	5	5	3	4	5	4	3	3	3	1	1	4	2	3	4	3	4	4	3	3	4	3	3	4	3	3	5	4	3	3	3	5	3	4	3	5	3	4	3	2	2
2	21	1	9	2	3	4	4	1	5	4	1	1	1	1	1	1	1	1	1	1	1	1	5	5	5	5	5	5	5	5	2	1	1	1	1	1	1	1	1	1	1	1	1	1	1	1	1	1	1
2	25	1	13	2	2	4	3	3	3	3	3	3	4	3	3	3	2	2	3	3	3	3	4	5	5	4	3	3	5	2	3	1	1	3	1	3	2	2	3	4	4	3	1	1	2	1	3	5	5
1	21	1	1	2	4	5	3	5	5	5	5	5	5	1	1	1	1	4	2	1	1	1	3	3	3	2	4	4	4	4	4	2	2	4	3	3	3	3	3	2	4	4	2	3	2	3	5	4	4
2	23	1	2	2	4	4	4	3	5	4	3	4	5	1	1	1	1	1	1	1	1	1	4	5	4	4	4	3	5	3	2	1	1	2	1	1	1	1	1	1	1	1	1	1	1	1	3	3	3
2	23	1	5	2	4	5	5	5	5	5	5	5	5	1	1	1	1	1	1	1	1	1	5	5	5	5	5	5	5	4	1	1	1	1	1	1	1	1	1	1	1	1	1	1	1	1	4	5	5
2	31	1	2	2	4	4	3	3	4	3	2	3	2	3	2	3	3	2	2	3	3	3	3	3	2	2	3	3	3	4	3	4	4	4	3	3	3	4	3	3	3	4	3	3	3	3	3	3	4
2	22	1	14	2	3	4	4	4	5	5	3	4	5	1	1	1	1	2	2	2	1	2	4	4	5	4	4	4	4	5	3	3	3	4	3	3	2	2	3	2	3	3	4	3	2	4	4	5	4
1	31	1	20	2	3	4	3	3	4	4	4	4	4	4	2	1	1	1	1	1	1	1	5	5	4	4	4	3	5	3	2	2	3	1	1	3	1	2	2	2	3	1	1	1	3	3	2	3	2
[truncated: 20 more columns]
